# Supplementary material for: Novel GPR34 and CCR6 mutation and distinct genetic profiles in MALT lymphomas of different sites
Source: PubMed Central journal article supplement — Haematologica. 2018 Apr 19;103(8):1329–36. doi: 10.3324/haematol.2018.191601 (PMC6068028; doi:10.3324/haematol.2018.191601), 2018-08
Supplement: 2018.191601.MOODY_SUPPL.pdf [file 2018.191601.MOODY_SUPPL.pdf]

## Novel *GPR34* and *CCR6* mutation and distinct genetic profiles in MALT lymphomas of different sites

Sarah Moody,<sup>1</sup> Joe Sneath Thompson,<sup>1</sup> Shih-Sung Chuang,<sup>2</sup> Hongxiang Liu,<sup>3</sup> Markus Raderer,<sup>4</sup> George Vassiliou,<sup>5</sup> Iwona Wlodarska,<sup>6</sup> Fangtian Wu,<sup>1</sup> Sergio Cogliatti,<sup>7</sup> Alistair Robson,<sup>8</sup> Margaret Ashton-Key,<sup>9</sup> Yingwen Bi,<sup>10</sup> John Goodlad<sup>11</sup> and Ming-Qing Du<sup>1,3,12</sup>

<sup>1</sup>Division of Cellular and Molecular Pathology, Department of Pathology, University of Cambridge, UK; <sup>2</sup>Department of Pathology, Chi-Mei Medical Centre, Tainan, Taiwan; <sup>3</sup>Molecular Malignancy Laboratory, Addenbrooke's Hospital, Cambridge University Hospitals NHS Foundation Trust, UK; <sup>4</sup>Department of Medicine I, Clinical Division of Oncology, Medical University of Vienna, Austria; <sup>5</sup>The Wellcome Trust Sanger Institute, Wellcome Genome Campus, Hinxton, Cambridge, UK; <sup>6</sup>Center for Human Genetics, KU Leuven, Belgium; <sup>7</sup>Institute of Pathology, State Hospital St. Gallen, Switzerland; <sup>8</sup>Department of Dermatopathology, St John's Institute of Dermatology, London, UK; <sup>9</sup>Department of Cellular Pathology, Southampton University Hospitals National Health Service Trust, UK; <sup>10</sup>Department of Pathology, Eye & ENT Hospital, Fudan University, Shanghai, PR China; <sup>11</sup>Department of Pathology, Western General Hospital, NHS Lothian University Hospitals Trust, Edinburgh, UK and <sup>12</sup>Department of Histopathology, Addenbrooke's Hospital, Cambridge University Hospitals NHS Foundation Trust, UK

©2018 Ferrata Storti Foundation. This is an open-access paper. doi:10.3324/haematol.2018.191601

Received: February 19, 2018.

Accepted: April 18, 2018.

Pre-published: April 19, 2018.

Correspondence: mqd20@cam.ac.uk

---

## SUPPLEMENTARY MATERIALS

### SUPPLEMENTARY FIGURES

**Figure S1.** Number of variants detected by WES in 21 cases of salivary gland and thyroid MALT lymphoma.

**Figure S2.** Validation of variants identified by WES in MALT lymphoma by Sanger sequencing.

**Figure S3.** Example of mutations detected by Fluidigm PCR and Illumina MiSeq sequencing.

**Figure S4.** Example of interphase FISH for detection of t(X;14)(p11;q32)/IGH-GPR34. Nuclei showing split signals are indicated by an arrow.

**Figure S5.** Heatmaps showing distribution of mutations in MALT lymphomas of the ocular adnexa (n=115), salivary gland (n=58), stomach (n=36) and thyroid (n=13). \*Samples lacking the described changes are not included. x denotes nonsense or frameshift mutations, d indicates deletion, t indicates translocation.

### SUPPLEMENTARY TABLES

**Table S1:** Cases of MALT lymphoma investigated by whole exome sequencing.

**Table S2:** Primers and conditions used for multiplex PCR with Fluidigm Access Array.

**Table S3:** Immunoglobulin heavy chain rearrangements in MALT lymphoma.

**Table S4:** Performance data of whole exome sequencing.

**Table S5.** A shortlist of potential pathogenic variants identified by WES, which were confirmed as somatic changes.

**Table S6:** Variants detected in novel genes by Fluidigm Access Array and Illumina MiSeq sequencing.

**Table S7:** Variants detected in genes previously screened by Fluidigm Access Array and Illumina MiSeq sequencing.

**Table S8:** Correlation between genetic changes and site involvement in ocular adnexal MALT lymphomas.

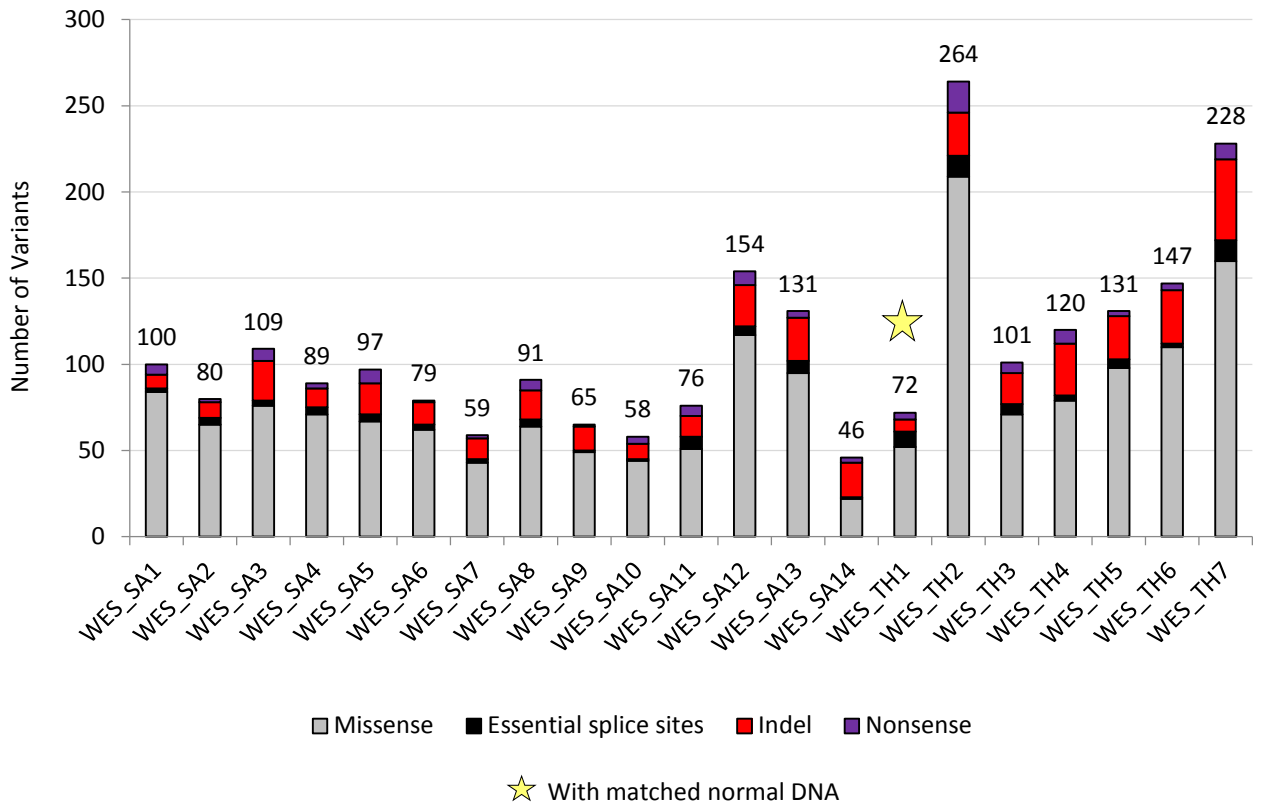

**Figure S1.** Number of variants detected by WES in 21 cases of salivary gland and thyroid MALT lymphoma.

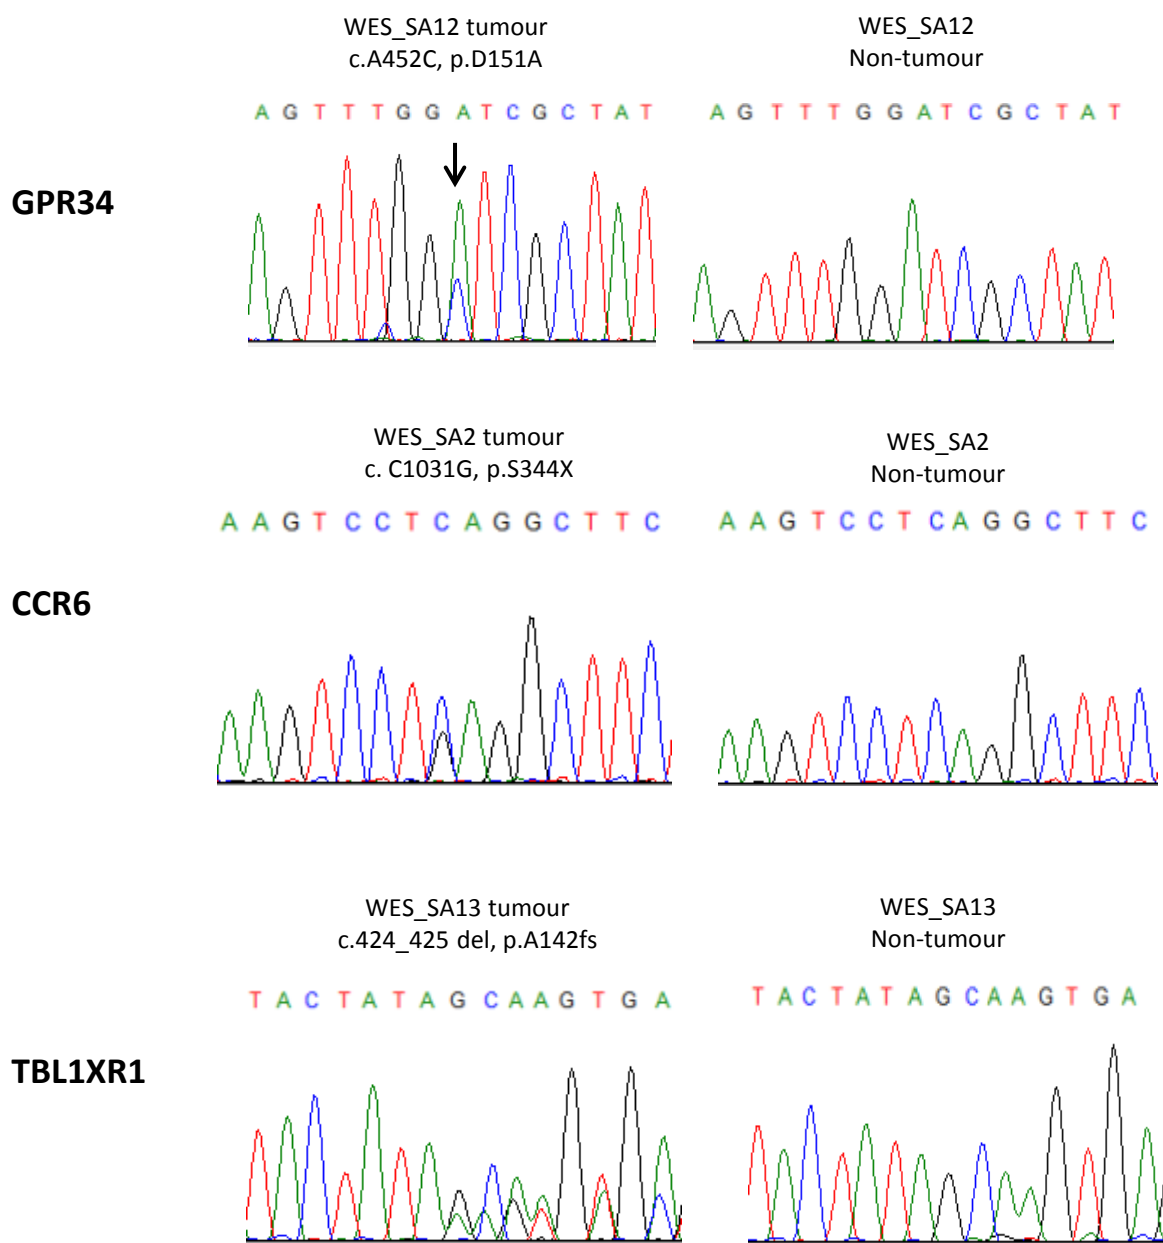

**Figure S2.** Validation of variants identified by WES in MALT lymphoma by Sanger sequencing.

### GPR34

SA\_060  
Nonsense  
c.1039C>T, p.Q347X

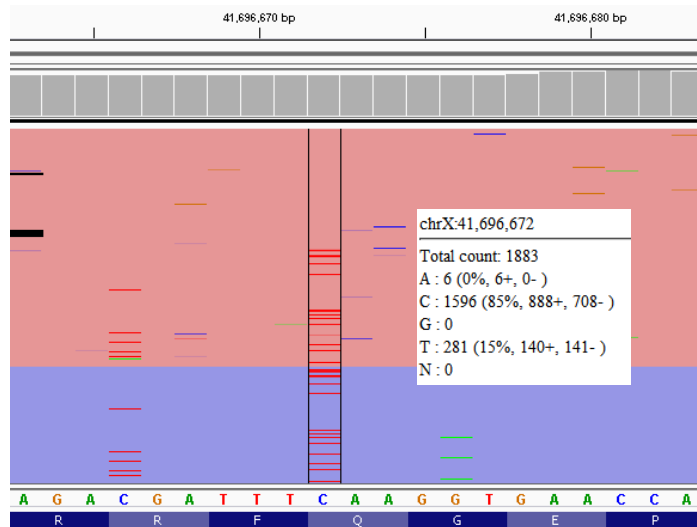

### CCR6

GA\_018  
Frameshift  
c.1069\_1070del, p.S357fs

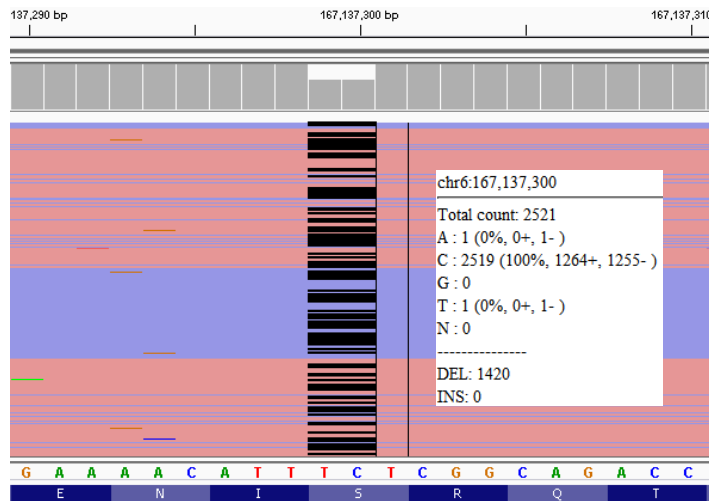

### TBL1XR1

SA\_062  
Missense  
c.1337A>G p.Y446C

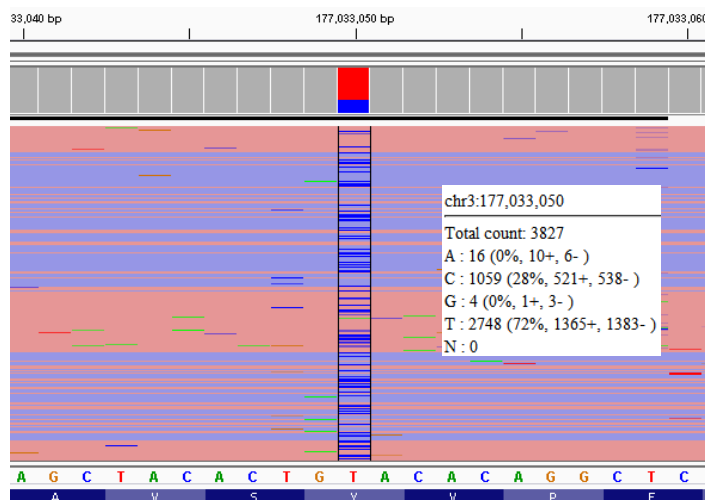

**Figure S3.** Example of mutations detected by Fluidigm PCR and Illumina MiSeq sequencing.

**IGH BAP probe**

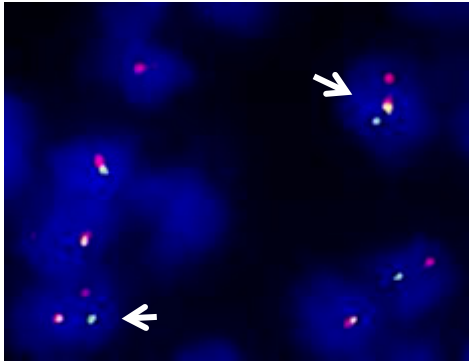

**GPR34 BAP probe**

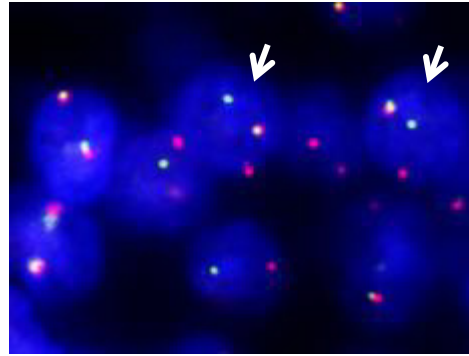

**Figure S4.** Example of interphase FISH for detection of t(X;14)(p11;q32)/IGH-GPR34. Nuclei showing split signals are indicated by an arrow



**Supplementary Table S1:** Cases of MALT lymphoma investigated by whole exome sequencing.

| Sample   | Site           | DNA origin | QC  | Diagnosis    | Sex    | Age | Notable Features                   |
|----------|----------------|------------|-----|--------------|--------|-----|------------------------------------|
| WES_SA1  | Salivary gland | FFPE       | 600 | MALT         | Male   | 71  | t(14;18)(q32;q21) <i>IGH-MALT1</i> |
| WES_SA2  | Salivary gland | FFPE       | 600 | MALT         | Female | 67  |                                    |
| WES_SA3  | Salivary gland | FFPE       | 400 | MALT         | Female | 68  |                                    |
| WES_SA4  | Salivary gland | FFPE       | 400 | MALT         | Female | 49  |                                    |
| WES_SA5  | Salivary gland | FFPE       | 400 | MALT         | Male   | 68  |                                    |
| WES_SA6  | Salivary gland | FFPE       | 600 | MALT         | Female | 74  |                                    |
| WES_SA7  | Salivary gland | FFPE       | 400 | MALT         | Female | 71  |                                    |
| WES_SA8  | Salivary gland | FFPE       | 400 | MALT         | Female | 64  |                                    |
| WES_SA9  | Salivary gland | FFPE       | 400 | MALT         | Female | 44  | t(14;18)(q32;q21) <i>IGH-MALT1</i> |
| WES_SA10 | Salivary gland | FFPE       | 300 | MALT         | Male   | NK  |                                    |
| WES_SA11 | Salivary gland | FFPE       | 300 | MALT         | Female | NK  |                                    |
| WES_SA12 | Salivary gland | FFPE       | 400 | MALT         | Male   | 32  |                                    |
| WES_SA13 | Salivary gland | FFPE       | 600 | MALT         | Female | 35  |                                    |
| WES_SA14 | Salivary gland | HMW        | -   | MALT         | NK     | NK  |                                    |
| WES_TH1  | Thyroid        | FFPE       | 300 | MALT + DLBCL | Female | NK  | Matched Germline DNA               |
| WES_TH2  | Thyroid        | FFPE       | 300 | MALT + DLBCL | Female | 72  |                                    |
| WES_TH3  | Thyroid        | FFPE       | 400 | MALT         | Female | 65  |                                    |
| WES_TH4  | Thyroid        | FFPE       | 600 | MALT         | Female | 69  |                                    |
| WES_TH5  | Thyroid        | FFPE       | 600 | MALT         | Female | 45  |                                    |
| WES_TH6  | Thyroid        | FFPE       | 600 | MALT         | Female | 50  |                                    |
| WES_TH7  | Thyroid        | HMW        | -   | MALT         | NK     | NK  |                                    |

NK = Not Known



**Supplementary Table S2:** Primers and conditions used for multiplex PCR with Fluidigm Access Array

| Gene  | Exon    | Primer name   | Genomic sequence amplified (hg38) | Forward primer              | Reverse primer           | Amplicon size (bp) |
|-------|---------|---------------|-----------------------------------|-----------------------------|--------------------------|--------------------|
| CCR6  | Exon 3  | CCR6_E2-3_1   | chr6:167136069+167136258          | GTGAGCTGAAGGGGCTGA          | CGCTGAAATTCATTGATTCTT    | 190                |
|       |         | CCR6_E2-3_2   | chr6:167136175+167136376          | TTTGGGTTCACTSTGGCTACT       | ACAAATAGCCTGGAGAACTGC    | 202                |
|       |         | CCR6_E2-3_3   | chr6:167136310+167136475          | ACTCAGTTGATTCTGAGATGTTACTGT | TCTGTCATAGACCTGGCCTTC    | 166                |
|       |         | CCR6_E2-3_4   | chr6:167136410+167136611          | CCTCCTGGGGAATATTCTGG        | GATGGCATAGATGCCTTTTAGC   | 202                |
|       |         | CCR6_E2-3_5   | chr6:167136501+167136691          | GCAGACATCCTCTTTGTTCTTACTC   | AATGACTTAGTCRCYGTACAATG  | 191                |
|       |         | CCR6_E2-3_6   | chr6:167136626+167136839          | GATGCTGCTCCTGACTTGC         | AGTCTGGTACTTGGGTTACAG    | 214                |
|       |         | CCR6_E2-3_7   | chr6:167136765+167136961          | TCCAGCTCAACTTTTGTCTTCA      | GCTTGACCAAGGTTTTGAC      | 197                |
|       |         | CCR6_E2-3_8   | chr6:167136889+167137093          | TCTTTGGTTTCTTTATCCCTTG      | CAGGATCGGTTCAATTTACCC    | 205                |
|       |         | CCR6_E2-3_9   | chr6:167137020+167137205          | CTGGCTTGTGAGATTCCTCATA      | GTTTCTGAACTTCTGCCCAAT    | 186                |
|       |         | CCR6_E2-3_10  | chr6:167137140+167137343          | CTGGCTTCTGCACTGCT           | GGACGACRCATTGTCGTTAT     | 204                |
|       |         | CCR6_E2-3_11  | chr6:167137212+167137396          | CTGAAGATCYTGAAGGACCTGT      | GAGTATGTTTCACAYRTGCCTTAG | 185                |
| FGFR3 | Exon 7  | R_FGFR3_E7H   | chr4:1801810+1801988              | CCCTGAGCRTCATCTGC           | ACCTTGCTRCCRTTCACTT      | 179                |
|       | Exon 9  | R_FGFR3_E9H   | chr4:1804318+1804531              | ATGTCTTTGCAGCCGAGGA         | CTTTCTGTTACCTGTGCGMTTGAG | 214                |
|       | Exon 14 | FGFR3_E14H    | chr4:1806041+1806224              | CCTTCCCAGTGCAATCC           | AGGCGTCYACTGGCATGA       | 184                |
| FOXO1 | Exon 2  | FOXO1_E2_1    | chr13:40560761-40560925           | TGTAGAATAGGAAGTTTTGCAAGC    | CACCCTCTGGATTGAGCATC     | 165                |
|       |         | FOXO1_E2_2    | chr13:40560656-40560831           | CAGCAAGTTCATTGTTGCTGC       | ACTGGAGAGATGCTTTCTTCTTG  | 176                |
|       |         | FOXO1_E2_3    | chr13:40560540-40560730           | CTGCATCCATGGACAACAAC        | AGTTCCGAGGRCGAAATGTACT   | 191                |
|       |         | FOXO1_E2_4    | chr13:40560435-40560616           | TTCCAAATGGCCTGCAA           | GGCAGATGGRGGGTACA        | 182                |
|       |         | FOXO1_E2_5    | chr13:40560297-40560499           | TTATGACYGAACAGGATGATCT      | CATGGTRCCAGGTGAGG        | 203                |
|       |         | FOXO1_E2_6    | chr13:40560185-40560390           | TCCCGAAAACATGGAAAATC        | GGGGCAAAGGGCTCAT         | 206                |
|       |         | FOXO1_E2_7    | chr13:40560063-40560246           | TTCACCCAGCCAAACTAC          | AATGTCATTATGGGAGGAGAGT   | 184                |
|       |         | FOXO1_E2_8    | chr13:40559927-40560127           | ATAACTGTGCGCCTGGACTC        | GGGAGCTGRGATTTCATT       | 201                |
|       |         | FOXO1_E2_9    | chr13:40559847-40560004           | TCATGATGGCCCTAATTC          | GTGGGCATGGTGCTTAC        | 158                |
|       |         | FOXO1_E2_10   | chr13:40559715-40559924           | ACCCACCSTGGACATGC           | AAGGCCATTCTGCCATAG       | 210                |
|       |         | FOXO1_E2_11   | chr13:40559617-40559826           | GACCAAGTGAAGACACCTGTA       | CCATCCATGAGGTCAATCC      | 210                |
|       |         | FOXO1_E2_12   | chr13:40559516-40559692           | GTGACTTGGATGGCATGTTT        | CTAACCTCAGCTGACACC       | 177                |
|       |         | R_FOXO1_E2_13 | chr13:40559384-40559579           | AACCAAAGTCTCCACACAG         | AAAGATCCCTCTGCAAGG       | 196                |
|       |         | GPR34_E3_1    | chrX:41695524+41695673            | AAATGACTCAATGTTGGCATTCC     | TGACTGAAGTTGTCGTCATTGTT  | 150                |
|       |         | GPR34_E3_2    | chrX:41695601+41695784            | AGCACTTCACTTTTTGATCTCC      | TTTCATCCATGGGACAGGTA     | 184                |

|               |                          |               |                          |                           |                          |                      |                    |     |
|---------------|--------------------------|---------------|--------------------------|---------------------------|--------------------------|----------------------|--------------------|-----|
| <b>GPR34</b>  | Exon 3                   | GPR34_E3_3    | chrX:41695712+41695901   | ACCAATCATAGCGACCAACC      | GAATGGAATTTCTTTACGGTGA   | 190                  |                    |     |
|               |                          | R_GPR34_E3_4  | chrX:41695825+41696020   | TTTCATCRTGGGACTGGTTG      | AACCTTGACAGAATCACACCT    | 196                  |                    |     |
|               |                          | GPR34_E3_5    | chrX:41695950+41696130   | GCCTCCCTTTCCGAATAATG      | ATTGCCTTCCGTTGCTGTAT     | 181                  |                    |     |
|               |                          | GPR34_E3_6    | chrX:41696055+41696239   | GCATTATTTGCTTGGATTGATT    | TGTGGAATTATGCCCTCCTT     | 185                  |                    |     |
|               |                          | GPR34_E3_7    | chrX:41696175+41696374   | TTGCTCTGGTGGATTCTCTAA     | CCTCAATAGATTCTCCCAATCTT  | 200                  |                    |     |
|               |                          | GPR34_E3_8    | chrX:41696280+41696485   | AAGCCATTTTTAACTTCATTCTTGT | GGCATGATAGGGAASAAAACATA  | 206                  |                    |     |
|               |                          | GPR34_E3_9    | chrX:41696386+41696550   | GAGGTCAAATTTCTTAATTCTGGT  | TGAACAATTTSTTTCCAGTAGCAA | 165                  |                    |     |
|               |                          | GPR34_E3_10   | chrX:41696489+41696639   | CGATTCATCTACATTTCTTCACAGC | TGCGAATGTTACTGGACATCA    | 151                  |                    |     |
|               |                          | GPR34_E3_11   | chrX:41696555+41696746   | ACCAATGAGATCATGCTGGTT     | TGCCACAGATGTATCATGCAG    | 192                  |                    |     |
|               |                          | GPR34_E3_12   | chrX:41696648+41696829   | TGCCAATCTTTTTAGACGATT     | TTCAAAGAATTAAGAGGCTGCAT  | 182                  |                    |     |
|               |                          | <b>IKBKB</b>  | Exon 7                   | IKBKB_Ex7                 | chr8:42306316+42306502   | TCAGCTTCTCCTTCTCTTTG | AGGACAGGAGCCCCACAA | 187 |
|               |                          | <b>NOTCH1</b> | Exon 34                  | R2_NOTCH1_E34_1           | chr9:136497450-136497634 | TCTGGTGATGGAACCTTGG  | GCAGGCGGTCCATATGAT | 185 |
| NOTCH1_E34_2  | chr9:136497289-136497503 |               |                          | TGCTGCTGGACCACCTTG        | CTTGAGGCTGCCAGGTA        | 215                  |                    |     |
| NOTCH1_E34_3  | chr9:136497192-136497406 |               |                          | GCTGCTGGACGAGTACAACC      | ACTTCTTCTCCGTGCCTTG      | 215                  |                    |     |
| NOTCH1_E34_4  | chr9:136497111-136497281 |               |                          | TGCAGGGCAAGAAGGTC         | GGTAGCCATGGGGTGACTC      | 171                  |                    |     |
| NOTCH1_E34_5  | chr9:136496972-136497175 |               |                          | CTGCCTCTGGACAGCTC         | GCCATCTCGGGCTTGG         | 204                  |                    |     |
| NOTCH1_E34_6  | chr9:136496837-136497044 |               |                          | ACCACCTGCCTGGGATG         | GACCCRCCACAGTGAA         | 208                  |                    |     |
| NOTCH1_E34_7  | chr9:136496716-136496930 |               |                          | CACCTCGTCTCTCCACCT        | GGAGGGGGCCTGTGTG         | 215                  |                    |     |
| NOTCH1_E34_8  | chr9:136496632-136496786 |               |                          | TGGTGCCGAACCAATACAAC      | GGGACGGCCTGGTAG          | 155                  |                    |     |
| NOTCH1_E34_9  | chr9:136496521-136496713 |               |                          | GCAGCATGGCATGGTAGG        | TTGCTGCTGYTGGATGTTT      | 193                  |                    |     |
| NOTCH1_E34_10 | chr9:136496418-136496610 |               |                          | CCTCACCTGGTGCAGACC        | CCTGGCTYRGCTCTCC         | 193                  |                    |     |
| NOTCH1_E34_11 | chr9:136496309-136496496 |               |                          | CCACAGCYRCACCTTG          | GTCACGGGTGGGACCAG        | 188                  |                    |     |
| NOTCH1_E34_12 | chr9:136496206-136496389 |               |                          | CCTGGCGGTGCACACTAT        | GGTGAGGAAGGGGTGCTC       | 184                  |                    |     |
| NOTCH1_E34_13 | chr9:136496103-136496276 |               |                          | ACAGCTACTCTCGCTGTG        | GGGACTGCATGCTGGTG        | 174                  |                    |     |
| NOTCH1_E34_14 | chr9:136496002-136496185 |               |                          | CCAGTGGTCCAGCTCGT         | CATCCACAGAGCGCACA        | 184                  |                    |     |
| UTR           | NOTCH1_E34_3UTR          |               | chr9:136495628-136495810 | TGAGAGCCAGGTTTTCTTA       | CTGGACGCCCCAGGAG         | 183                  |                    |     |
|               | Exon 3                   | PIK3CD_E3     | chr1:9710407+9710621     | CATTTCTTATTTTTAGGACAACCTG | TCTGAGGACCGGATGGAG       | 215                  |                    |     |
|               | Exons 4-5                | PIK3CD_E4-5_1 | chr1:9715492+9715688     | CCCAGTGGTGCCTTG           | GCAGGAAGGGGCTGCAC        | 197                  |                    |     |
|               |                          | PIK3CD_E4-5_2 | chr1:9715625+9715838     | ACAGCGGAGCAGCAAGAG        | GGGAGGGCTGSGTCAG         | 214                  |                    |     |
|               |                          | PIK3CD_E4-5_3 | chr1:9715725+9715908     | TGAAGAAGCTCATCAAYTCACAGA  | ACATCTTGGCGCAAAGTC       | 184                  |                    |     |
|               |                          | PIK3CD_E4-5_4 | chr1:9715847+9716033     | AGGCCTCCACGAGTTTGACT      | GAGCCGCAGGGTACCAG        | 187                  |                    |     |
|               |                          | PIK3CD_E4-5_5 | chr1:9715959+9716148     | GCCTGGCTGCAGTACAGTTT      | GGAGTTTCACAGAGGAAGTGCT   | 190                  |                    |     |
|               | Exon 6                   | PIK3CD_E6_1   | chr1:9716333+9716509     | TGAACTCCCAGACCCTACC       | TCTCCGCAGGGCACA          | 177                  |                    |     |

**PIK3CD**

|             |                 |                          |                          |                          |     |
|-------------|-----------------|--------------------------|--------------------------|--------------------------|-----|
|             | PIK3CD_E6_2     | chr1:9716442+9716653     | GAGCTTCACCTCCAGGTGTC     | GAGCCCAGAGTGCAGAGG       | 212 |
| Exon 7      | PIK3CD_E7_1     | chr1:9716895+9717099     | ATCCTGGTGTCCAGGGAGT      | AGGAATGGGAGGTGGTTTG      | 205 |
|             | PIK3CD_E7_2     | chr1:9717007+9717185     | GTCCATTCTCCTCCATCCT      | GGCCAGTAGCACATGGAGTT     | 179 |
| Exon 8      | PIK3CD_E8       | chr1:9717485+9717694     | AGACAAGCTGCACTTTGAGC     | CTCCAGGATACAGCCACCTT     | 210 |
| Exon 9      | PIK3CD_E9_1     | -                        | GCCTCTGCCTCCTCACC        | GTACAGCGCAAAGCAGAGAC     | 205 |
|             | PIK3CD_E9_2     | chr1:9718786+9718972     | GAAGCAGCRGCTGGAGT        | AGGGGCTGTACTGGCTCTC      | 187 |
| Exon 10     | PIK3CD_E10      | chr1:9719884+9720067     | CTGAGTGGGTGTCCTCACCT     | TCTGGGACCCTCACACTCC      | 184 |
| Exon 11     | PIK3CD_E11      | chr1:9720074+9720279     | GGTCACCCCTCTACAACCTCA    | CAGCCCTCAGCCTCAC         | 206 |
| Exon 13     | PIK3CD_E13_1    | chr1:9720705+9720895     | TGGAACCAGAGCCCTCAC       | CATGCTTGTCCACTTGGTG      | 191 |
|             | PIK3CD_E13_2    | chr1:9720799+9720971     | GAGAAGGACCTGGTGTGGAA     | GTGGGTAGCCAGAGGCTGT      | 173 |
| Exon 14     | PIK3CD_E14_1    | chr1:9721062+9721221     | CCCTTACCCTGACCACCTC      | AAGGAGCSTACGTGGCAAT      | 160 |
|             | PIK3CD_E14_2    | chr1:9721125+9721321     | AGATGCTCTACCTKCTGTGCT    | CCAGAGCCCACTGCTCT        | 197 |
| Exon 15     | PIK3CD_E15_1    | chr1:9721386+9721576     | AGCTCCCTCCTGTCTGAGT      | GAAAAGGAAGTGGCCGATCT     | 191 |
|             | PIK3CD_E15_2    | chr1:9721475+9721652     | CTGGTGCAGGTGCTCAAGTA     | AGTGGCCTTCCAGGGAGA       | 178 |
| Exons 16-18 | PIK3CD_E16-18_1 | chr1:9721734+9721944     | AGGCTCAGCCCTCCCTTC       | CAGGTCCCAGCCTCGAC        | 211 |
|             | PIK3CD_E16-18_2 | chr1:9721848+9722055     | GCTGATGAAGCAGGTGAGG      | CTTGGTCTGGGGCTTGG        | 208 |
|             | PIK3CD_E16-18_3 | chr1:9721977+9722189     | GGAAGCACTGAGCAAAGTGA     | GGTGGGAGGAACCCTTGT       | 213 |
|             | PIK3CD_E16-18_4 | chr1:9722134+9722318     | ACCCTGCTGGCTGAAGTCT      | CTGCCTGCCTCCTCGTT        | 185 |
|             | PIK3CD_E16-18_5 | chr1:9722249+9722447     | AGCAGTGCACCTTCATGG       | CCAGGATTCTGTCTTCTCCAC    | 199 |
| Exon 19     | PIK3CD_E19      | chr1:9722456+9722644     | GGCTTGGGTGTAGCTGGA       | ACAGACACCAAGGGACGATG     | 189 |
| Exon 20     | PIK3CD_E20_1    | chr1:9723062+9723263     | CAAGTGGCCTCAGGGACA       | CAGGGCATCCTTGTGAAG       | 202 |
|             | PIK3CD_E20_2    | chr1:9723182+9723343     | ACTCCGTTCCAGACACCATCG    | TCCACACCTCTTGAAAGGA      | 162 |
| Exon 21     | PIK3CD_E21_1    | chr1:9723880+9724077     | GATTCAAGGGGAGAGGGAGT     | GATCATGATGTTGTGCTGTG     | 198 |
|             | PIK3CD_E21_2    | chr1:9723983+9724173     | GAGCCATTGAGGAGTTCACC     | GCTGTGTGCTAGGCAGAGG      | 191 |
| Exon 22     | PIK3CD_E22_1    | chr1:9724209+9724397     | TGTCTCCCTGGATTCTCTC      | GTCTTCCCTGCTGAATCAC      | 189 |
|             | PIK3CD_E22_2    | chr1:9724281+9724489     | CCACATTGATTTGGCCACT      | GGGAACCTCTGCCCTGTT       | 209 |
| Exon 23     | PIK3CD_E23_1    | chr1:9724763+9724931     | GGAGTCCCAGAGCCTCACT      | GATACTGGATGTCTTTGGAGCA   | 169 |
|             | PIK3CD_E23_2    | chr1:9724823+9725032     | AGGGCCTACACCATCTG        | TGGGGCCTACTGCATTC        | 210 |
| Exon 24     | PIK3CD_E24_1    | chr1:9726847+9727053     | GACGCATCCCAGAGCAAG       | GGAGCCACTACTGCCTGTTG     | 207 |
|             | PIK3CD_E24_2    | chr1:9726915+9727104     | CTGGCACTGGGGAAAACAG      | TGCTTGGTCCCCACGAC        | 190 |
| Exon 3      | TBL1XR1_E3      | chr3:177064819-177065024 | AGGGTTATATCCTGTGTTGTGACC | AAGTTCAACGGTTTGGACTGA    | 206 |
| Exon 4      | TBL1XR1_E4_1    | chr3:177053812-177054014 | TGGGATTTGAAAAGATGATGG    | TTTCTGGATGATAGAAATCAATGC | 203 |
|             | TBL1XR1_E4_2    | chr3:177053694-177053886 | GAAAGCCATATCAGTCAGTCCA   | TGAATAAGCAAGCAAGACAGC    | 193 |

|         |               |                          |                            |                                |                             |     |
|---------|---------------|--------------------------|----------------------------|--------------------------------|-----------------------------|-----|
| TBL1XR1 | Exon 5        | TBL1XR1_E5_1             | chr3:177051672-177051857   | TGAATTCAGAAAGTTCCTAAAAATG      | CGGCATCTATCAGGGACAG         | 186 |
|         |               | TBL1XR1_E5_2             | chr3:177051528-177051735   | CAAATCCAGGATGGTACCTTGT         | CCTCCCCATTTGCTGTGTT         | 208 |
|         |               | TBL1XR1_E5_3             | chr3:177051381-177051584   | CTGCAGCCAGCCAACAA              | CAACAAACCCCTGTGATATGAG      | 204 |
|         | Exon 6        | TBL1XR1_E6_1             | chr3:177050500-177050680   | AAGAAATCACCCATCCACCA           | CAGGGTCCAGGCACAGATA         | 181 |
|         |               | TBL1XR1_E6_2             | chr3:177050374-177050574   | TTGAAATCCCTCCTAATAAAGCTG       | TGGCCACAACCTAAGCAACAA       | 201 |
|         | Exon 7        | TBL1XR1_E7_1             | chr3:177050031-177050210   | TGTAATATGTTGCCTTGTCTGA         | GGAACATCTTGCCCTCCTTC        | 180 |
|         |               | TBL1XR1_E7_2             | chr3:177049920-177050099   | GAACAGCACCACTGGCTCTA           | AACCTGCCGTGAGTATGAG         | 180 |
|         | Exons 8-9     | TBL1XR1_E8&9_1           | chr3:177047488-177047698   | GGCACTCACAGTAGGCAAA            | TCTTTAGTCCATATTCTGGCAAAC    | 211 |
|         |               | TBL1XR1_E8&9_2           | chr3:177047362-177047551   | AGAGTGAAGGTACACTTCTAGCAAC      | GGCCTTTAYGCTGCCCTA          | 190 |
|         |               | TBL1XR1_E8&9_3           | chr3:177047273-177047474   | ATTTTCCTTYTTACTTTGTTGTTGA      | CCTTTACAGAACTTAATGAGCTTTTAC | 202 |
|         | Exon 10       | TBL1XR1_E10              | chr3:177046080-177046294   | CCACTCTGACATTTTATGCTG          | GAAAAACAGAAAYCAAGCTCCA      | 215 |
|         | Exon 11       | TBL1XR1_E11_1            | chr3:177038301-177038507   | TGGTTCAAAGCTAAAACCTTGG         | AAGGTTTCTTACCGTATGCCTTG     | 207 |
|         |               | TBL1XR1_E11_2            | chr3:177038259-177038431   | CAGCATTGGATGTTGATTGG           | TGAAACATTACTTGTTAATCATGACC  | 173 |
|         | Exon 12       | TBL1XR1_E12              | chr3:177038035-177038238   | TGTTTAATATCAAGTAGTACCCAGT      | AATGGCCAGAGCAACCATAC        | 204 |
|         | Exon 13       | TBL1XR1_E13_1            | chr3:177034204-177034379   | AAATATACTCATTGWRTGGAAAAATAATTG | AACATAAGGTTGGCATTGGA        | 176 |
|         |               | TBL1XR1_E13_2            | chr3:177034102-177034315   | TGAAACAAGACAATTGTGTCCA         | TCCACTTCATGAAATCTTCCCTA     | 214 |
| Exon 14 | TBL1XR1_E14_1 | chr3:177033015-177033223 | TTGGCTGAATATGGGAGGTT       | CCAGATACCTGCCATCAGGA           | 209                         |     |
|         | TBL1XR1_E14_2 | chr3:177032881-177033093 | GGGATATGCATCCATACCTTG      | AATGACAACCAAATGGTGAGG          | 213                         |     |
| Exon 15 | TBL1XR1_E15   | chr3:177026339-177026553 | TGTAATATTTTTATTTCAGCATTGGA | CACACCTCTTTGGAAACT             | 215                         |     |
| Exon 16 | TBL1XR1_E16   | chr3:177025456-177025660 | TTCCATGATTATTATGCTTTACCAA  | TGTACACATTCATAGTCGGTCCA        | 205                         |     |
|         | TET2_E3_1     | chr4:105233906+105234076 | AGAGGGCAGCCTTGTGG          | TGAGCTCTCTCAGGCAGTGG           | 171                         |     |
|         | TET2_E3_2     | chr4:105233987+105234186 | TCCATTCCTGATACCATCACC      | TTTCTTGTAAGTCAGGACTCA          | 200                         |     |
|         | TET2_E3_3     | chr4:105234095+105234296 | CACCAAGTGGCACTTTTCA        | AGCCTTTTGKCTTGTTTCAA           | 202                         |     |
|         | TET2_E3_4     | chr4:105234215+105234419 | TGGAGGAATAAAACGCACAG       | TGCATTTTCTTGGGCTACAG           | 205                         |     |
|         | TET2_E3_5     | chr4:105234324+105234506 | AGCCAAGAAAGAAATCCAGGT      | TTTCCCTCCTGCTCATT              | 183                         |     |
|         | TET2_E3_6     | chr4:105234455+105234664 | CAGTGGGCMTGAAAATCC         | GCAATGGAACACAATCTGG            | 210                         |     |
|         | TET2_E3_7     | chr4:105234595+105234803 | TGGAACACACATGGTGAA         | CTTTGGAGGCAGCTCAGAGT           | 209                         |     |
|         | TET2_E3_8     | chr4:105234707+105234913 | GGCTACTAATGAGTTGTCCTGTGA   | TGTTGTAGTTGTTCTGGTTTCTGA       | 207                         |     |
|         | TET2_E3_9     | chr4:105234823+105235028 | AGGCCTGTGATGCTGATGAT       | AGCTTGCAAATTGCTGCTG            | 206                         |     |
|         | TET2_E3_10    | chr4:105234928+105235136 | TTGAGATATGCCATCTCCTG       | TGGTGTGGTASTGGCAGAAA           | 209                         |     |
|         | TET2_E3_11    | chr4:105235075+105235283 | GTGCTTACTTCAAGCAAAGCTCA    | CCTTAAAAGTGTGTGTTACTTTGG       | 209                         |     |
|         | TET2_E3_12    | chr4:105235213+105235397 | GCACTCTGAATGGTRGAGTTT      | CACACAATTAYTCTGAGGCCTTT        | 185                         |     |
|         | TET2_E3_13    | chr4:105235300+105235497 | GTAAACCTGAGGCACCACCT       | AAATTGGTGGTTATGCTTGA           | 198                         |     |

## TET2

|         |              |                          |                           |                           |     |
|---------|--------------|--------------------------|---------------------------|---------------------------|-----|
| Exon 3  | TET2_E3_14   | chr4:105235429+105235643 | TGACTGTTCCATTGTGTTCTGAG   | CAATTCATCCATCCTGGTTTC     | 215 |
|         | TET2_E3_15   | chr4:105235573+105235782 | GAGACAAGGAGCAAACACGA      | CCCCAGGCATGTTGGA          | 210 |
|         | TET2_E3_16   | chr4:105235715+105235899 | GTATCAACCCAATCTCTCAATCA   | ACTGGAGATGTTGGTCCACTGT    | 185 |
|         | TET2_E3_17   | chr4:105235843+105236045 | ACCAAGTTGAAATGAATCAAGG    | CTGTTTCAAACTGGGGACA       | 203 |
|         | TET2_E3_18   | chr4:105235956+105236163 | CATGTGCAGTCACTGTGTGG      | TTTGAGGGGAGATGTGAACTCTG   | 208 |
|         | TET2_E3_19   | chr4:105236086+105236286 | ACTCACACCTTTTGCAACATAAGC  | CCACTTTAGTCTGGCCAAAGAAT   | 201 |
|         | TET2_E3_20   | chr4:105236234+105236423 | AAGCAACRATGATCAGCAAAGA    | TGCACTTGATTCATGGTCTG      | 190 |
|         | TET2_E3_21   | chr4:105236339+105236521 | TCATAATGTCYAAATGGGACTG    | TGGGCTCTGTTTCCTGCAA       | 183 |
|         | TET2_E3_22   | chr4:105236437+105236607 | TTTCTTGTTCAAACAATWCACACCT | TCTGCTCTGTTCTTGAAAGC      | 171 |
|         | TET2_E3_23   | chr4:105236552+105236755 | TAATGTGATCCCAAAGCAAGAT    | GTGTGACTTCCTCCCTGGTC      | 204 |
|         | R_TET2_E3_24 | chr4:105236687+105236883 | TCAGCAAAGGTAATGATACATAACC | TTGGCCTGTRCATCTGACTA      | 197 |
|         | TET2_E3_25   | chr4:105236789+105236990 | TGCTGCTCTAAGGTGGCATC      | ACAGCTTMAGGYGGATTCT       | 202 |
|         | TET2_E3_26   | chr4:105236931+105237106 | CCACCAGAAAACAAAACATGG     | TTTACTTGCTTCTGTGATTTGAGA  | 176 |
|         | R_TET2_E3_27 | chr4:105237039+105237206 | AAGCAGTTTCACGYCAAGT       | TGAAGAAGTTGTTKGCTGCTCT    | 168 |
|         | TET2_E3_28   | chr4:105237152+105237365 | TGCTGCAGAACTTGATAGCC      | TTTCTGGSACTTACCTACACATCT  | 214 |
|         | TET2_E3_29   | chr4:105237301+105237463 | TGGATACACCTGTCAAGAYTCAATA | CAAATTGCTGCCAGACTCAA      | 163 |
| Exon 4  | TET2_E4_1    | chr4:105241237+105241426 | TTAGAGCCCTTAATGTGTAGTTGG  | TCTTCCATGATTTCTTAATAGCTG  | 190 |
|         | TET2_E4_2    | chr4:105241369+105241518 | TTTATACCATCTAGGAGCAGGTC   | GTTTACTGCTTTGTGTGAAGG     | 150 |
| Exon 5  | R_TET2_E5    | chr4:105242763+105242973 | CAAATATTTTGATTGCCTCTTGA   | AAATGCCCAAGATTTAAGACCA    | 211 |
| Exon 6  | TET2_E6_1    | chr4:105243542+105243738 | GTTTGGGATGGAATGGTGAT      | ATTTCTCAGCGTCTCGGTA       | 197 |
|         | TET2_E6_2    | chr4:105243655+105243865 | TGATTCTCATCCTGGTGTGG      | GCACGCTGAACTCTCTTCT       | 211 |
| Exon 7  | TET2_E7_1    | chr4:105259558+105259759 | TCAGCTGCACAGCCTATATAATG   | TCATCCCAAGCAGCTTAAA       | 202 |
|         | TET2_E7_2    | chr4:105259701+105259902 | AATGGATGTAAGTTTGCCAGAAG   | AGTGTGTATCTACAGTTTGGGAAAA | 202 |
| Exon 8  | TET2_E8_1    | chr4:105261655+105261846 | TGTTTGGGATTCAAAATGTAAGG   | GATTATTATAYGCATCAGGTGCAAG | 192 |
|         | TET2_E8_2    | chr4:105261776+105261980 | TCATTTGCAAAACCTGTCCA      | CAGTGGTTTCAACARTTAAGAGGA  | 205 |
| Exon 9  | TET2_E9      | chr4:105269576+105269778 | TACTTTTCGATTCACACACACTT   | CAGCTGCTAAGCTGTCTCA       | 203 |
| Exon 10 | TET2_E10_1   | chr4:105272510+105272689 | CACGTTTTCTTTGGGACCTG      | CTCCTGAGCTTCCACTCC        | 180 |
|         | R_TET2_E10_2 | chr4:105272585+105272774 | GACAATCGAGAATTTGGAGGA     | GGCAAGTCTTGACTGGCTCT      | 190 |
|         | TET2_E10_3   | chr4:105272710+105272913 | CATTCAGGTAAGTCTTTTCG      | AACTGTTTAGCCTGGCTTGC      | 204 |
|         | TET2_E10_4   | chr4:105272823+105273005 | CCCTGGAGAACAGCTCAAAT      | AAGTTGATGGGRGCAAAAC       | 183 |
| Exon 11 | TET2_E11_1   | chr4:105274998+105275209 | TCATCAACATCAAAGATACCTGTTT | TGGTGGATCCAGAAGCAGA       | 212 |
|         | TET2_E11_2   | chr4:105275131+105275324 | CAGCAGAGACCCAGCAG         | GCAGCTTGAGATGAGGTGGA      | 194 |
|         | TET2_E11_3   | chr4:105275241+105275445 | TCCTTATCCAAACTCTTACACA    | ATATGGGGAGCAGTTGTCCA      | 205 |

|          |               |                         |                          |                          |                          |     |
|----------|---------------|-------------------------|--------------------------|--------------------------|--------------------------|-----|
|          |               | TET2_E11_4              | chr4:105275373+105275562 | TTTGAATCAGAATACCCAATATCC | TCCAAACCTTGGCTGGTAA      | 190 |
|          |               | TET2_E11_5              | chr4:105275498+105275709 | GCCAAGACCCTCTGTCTAAGC    | GAAGTGGCCATCCATCTCAT     | 212 |
|          |               | TET2_E11_6              | chr4:105275622+105275819 | TGGTTTCAGCAGTTGTACCATTA  | GGAGCTGCAYTGTAGTTATGGAT  | 198 |
|          | Exon 11       | TET2_E11_7              | chr4:105275741+105275947 | TGAGCAATCCAACATGGAC      | GGACACAAGCAGTTCTATCATGG  | 207 |
|          |               | TET2_E11_8              | chr4:105275870+105276052 | ATGACATGCTTTCCACACA      | ACCAGACCTCATCGTTGTCC     | 183 |
|          |               | TET2_E11_9              | chr4:105275974+105276149 | GCTAATGGTCAGGAAAAGCAG    | AGCTCACGCTTTCACACT       | 176 |
|          |               | TET2_E11_10             | chr4:105276068+105276260 | GCTTCTGGATCCTGACATTG     | CAAAGAGCCAAGCCATGTT      | 193 |
|          |               | TET2_E11_11             | chr4:105276177+105276388 | CAATAGGAATCACCCACCA      | AAGTTTCATGTGGCTCAGCA     | 212 |
|          |               | TET2_E11_12             | chr4:105276317+105276485 | GCCCAGACTATGTGCCTCA      | GTGAAGGCATATGGAGATGTAGTT | 169 |
|          |               | R_TET2_E11_13           | chr4:105276419+105276617 | CTCTTGCCGAAAGGACCAT      | ACTGTGACCTTCCCCACTG      | 199 |
| TNFRSF14 | Exon 1        | R_TNFRSF14_E1           | chr1:2556631+2556813     | CTGGGTTCCCGAGCTG         | CATGGGGAAGAGATCTGTGG     | 183 |
|          | Exon 2        | TNFRSF14_E2             | chr1:2557696+2557910     | ATCTCCAATGCCTGTCTCT      | GGGTGTCTGGGGCAGAA        | 215 |
|          | Exon 3        | TNFRSF14_E3_1           | chr1:2558246+2558458     | GTCTCCCTGCTTGGGCTCT      | CATTTGGCACTGCAGACACT     | 213 |
|          |               | TNFRSF14_E3_2           | chr1:2558377+2558565     | GGGCACAGTGTGTGAACC       | CCTTCTGGGGCACTGT         | 189 |
|          | Exon 4        | TNFRSF14_E4_1           | chr1:2559726+2559911     | CCCTGGCAGCAGTCCCTT       | GTCCTGGACRATGCAGAAGT     | 186 |
|          |               | TNFRSF14_E4_2           | chr1:2559844+2560023     | GGAAGTCTCCAGGACAGAG      | GGACCAGGTTGAAATGG        | 180 |
|          | Exon 5        | TNFRSF14_E5             | chr1:2560542+2560756     | CTCACAGACAAGCAGTCCCTA    | CTCCCCAGGGCACAGA         | 215 |
|          | Exon 6        | TNFRSF14_E6_1           | chr1:2561609+2561788     | TGAGGCTGAGTGAACACTGG     | TGATTAGGCCAACTGTGGAG     | 180 |
|          |               | TNFRSF14_E6_2           | chr1:2561721+2561880     | CTGGGTATGGTGGTTTCTCTC    | GGTGACAGAGCTCCAAGAGG     | 160 |
| Exon 8   | TNFRSF14_E8_1 | chr1:2563060+2563254    | CAAAGTAAAGCAGTAAATGAACC  | CCCGTGAATGAGGGTATTGT     | 195                      |     |
|          | TNFRSF14_E8_2 | chr1:2563165+2563341    | AGAAGGTGAGGCCACAGTCA     | AGGTGGACAGCCTCTTTCAG     | 177                      |     |
| CD79B    | Exon 2        | CD79B_ex2_1             | chr17:63931281-63931479  | CAGGACATAGTCGCACACAAC    | AGTAGCTCCGGGAACATAGAGG   | 200 |
|          | Exon 3        | CD79B_ex3_1             | chr17:63930024-63930219  | CTAGGGTGGGGCGGACAG       | CATGGAAGAGTCCCAGAACGAAT  | 196 |
|          |               | CD79B_ex3_2             | chr17:63930111-63930300  | CTCCGAGGTGTTGTTGCATTCT   | CAGCGCCTCCGGCAAT         | 190 |
|          |               | CD79B_ex3_3             | chr17:63930239-63930431  | GCTGCTGGGGATTCTCGTC      | AGGAAGATGCCAAGCGGAATG    | 193 |
|          | Exon 4        | CD79B_ex4_1             | chr17:63929673-63929858  | CACAACGAGAGCTGGGGAGA     | GGAACACGCTGAAGGATGGT     | 186 |
|          |               | CD79B_ex4_2             | chr17:63929772-63929943  | TGTCCAGCAGCAGGAAGATAG    | AGGCCTAAAAGGTGGACTGTG    | 172 |
| Exon 5   | CD79B_ex5_1   | chr17:63929362-63929539 | CCCAACCACACCAGCAGATAGT   | GGCCCAGCAGGGGATG         | 178                      |     |
| Exon 6   | CD79B_ex6_1   | chr17:63929167-63929351 | CTCCGAAGCAGTCACTGAGG     | GGCCTGAGTTCCACTTAATGTC   | 186                      |     |
| CD79A    | Exon 2        | CD79A_ex2_1             | chr19:41878940-41879106  | AATGTGTACCATCCCCAG       | AGGTGACGTTGGCGTTGTT      | 167 |
|          |               | CD79A_ex2_2             | chr19:41879015-41879213  | GCACAAGTCCCAGCATCAT      | CCCATGGCTCTTGTTCACATTCT  | 199 |
|          |               | CD79A_ex2_3             | chr19:41879135-41879330  | GTGGCCCCCTGAGTCTTG       | AGCGGGACAGTGGGAGTAGG     | 196 |
|          | Exon 3        | CD79A_ex3_1             | chr19:41879480-41879679  | GAGGCTAGGGAGGGCAAGAG     | TGACTCAGAGTCCGAGGG       | 200 |

|        |                  |                          |                                  |                               |     |
|--------|------------------|--------------------------|----------------------------------|-------------------------------|-----|
| Exon 4 | CD79A_ex4_1      | chr19:41880599-41880779  | CATCCAGGAGGGTCTGAAAGATA          | CTAACACAACCTGCCCTACCC         | 181 |
|        | CD79A_ex4_1_new2 | chr19:41880619-41880781  | ATATTCACCTCCCCCTGCTC             | CCCTAACACAACCTGCCCTA          | 180 |
| Exon 5 | CD79A_ex5_1      | chr19:41880840-41881038  | ATGTTGCTGCCTCATTCCAT             | CTGAGACTGGAGCTGGGTG           | 199 |
| Exon 1 | MYD88_ex1_1      | chr3:38138414-38138585   | CCTACTAGCACCATCACCAGACC          | CTGCCCTACAATCTGGAGCC          | 172 |
|        | MYD88_ex1_2      | chr3:38138487-38138675   | CTTCTTACGCCCCACATC               | CGGTGGGTGCGATTGTC             | 189 |
|        | MYD88_ex1_3      | chr3:38138593-38138775   | CTTCTCGAAAGCGAAAGCCG             | GAGAGCAGCCAGGGGAAGG           | 183 |
|        | MYD88_ex1_4      | chr3:38138699-38138888   | CCATGGCTGCAGGAGGTCC              | TGCCGGATCTCCAAGTACTCAA        | 190 |
|        | MYD88_ex1_5      | chr3:38138793-38138959   | CCGCTGTCTCTGTTCTTGA              | CTACAGAGGCCCGAGGG             | 167 |
|        | MYD88_ex1_6      | chr3:38138874-38139084   | CTTGAGATCCGGCAACTG               | CGGAAAGTCAGCCTCCTCAC          | 211 |
| Exon 2 | MYD88_ex2_1      | chr3:38139793-38139992   | CTGGATCCTGACTGTGGGTAAAG          | GGTCATCAAGTGTGGTGATGC         | 200 |
|        | MYD88_ex2_2      | chr3:38139858-38140051   | CCACAGAGGAGGATTGCCA              | ACACCACAATGCTCTATTCCACC       | 194 |
| Exon 3 | MYD88_ex3_1      | chr3:38140314-38140506   | AGGGGACTCTTGCTGGA                | AGACACACAACCTCAGTCGAT         | 193 |
|        | MYD88_ex3_2      | chr3:38140412-38140610   | CCTTCATCTGCTATTGCCCCAG           | CTTCATGCATCCACGCACC           | 199 |
| Exon 4 | MYD88_ex4_1      | chr3:38140696-38140895   | TCCCAGGGGATATGCTGAACTAAG         | CACCTACACATTCCTCATTCTCT       | 200 |
| Exon 5 | MYD88_ex5_1      | chr3:38141069-38141260   | GACTGGGCTTGTCCACCA               | GGCGAGTCCAGAACCAAGATT         | 192 |
|        | MYD88_ex5_2      | chr3:38141151-38141325   | GATCCCCATCAAGTACAAGGCA           | CAGACAGATACACACACCCAGG        | 175 |
| Exon 1 | PRDM1_ex9_1      | chr6:106086471-106086659 | GAGGTGCGCGTCTGTGC                | GGAAAAGAAAATAAAGTTTTAGATCAATT | 189 |
| Exon 2 | PRDM1_ex10_1     | chr6:106088128-106088304 | GTATAGCCTCTCAGAAGGAGCCA          | CACAGAGTCATATCCGCATCCTC       | 177 |
|        | PRDM1_ex10_2     | chr6:106088230-106088429 | GAGGTTTCAGGGATTGGCAG             | ACTTGAAAAGCAGATTTCCTTGGT      | 200 |
|        | PRDM1_ex10_3     | chr6:106088329-106088508 | GTGTACATACATTGTAACGACCAC         | CAAGTAGGGAGATTGGCACC          | 180 |
| Exon 3 | PRDM1_ex11_1     | chr6:106095553-106095724 | TGAAAAGATTGGTTAACATTTTATAGTCAAAG | TATTTCTGTTGGCGTCTTAGG         | 172 |
|        | PRDM1_ex11_2     | chr6:106095605-106095800 | TCCTGTTTAGGTTATTGGAGTGATGAG      | ACCCAGCTCTTTAGCTCCATTT        | 196 |
| Exon 4 | PRDM1_ex5_3      | chr6:106099414-106099604 | TGTCAGAACGGGATGAACATCTAC         | CAGAACCGACATTACTGGCATT        | 191 |
|        | PRDM1_ex5r_1     | chr6:106099277-106099462 | TGCTGTCTTCTTTTGGAC               | CAGGGATGGGCTTAATGGT           | 186 |
|        | PRDM1_ex5r_2     | chr6:106099350-106099532 | GAAAAGCAACTGGATGCGCTATG          | TCTCCGGGATAAGGGTAGTGAAG       | 183 |
| Exon 5 | PRDM1_ex6_1      | chr6:106104763-106104962 | TGGCAGTTTTGCTTCAGTTCTC           | GGTAGAGGTCTTTCTTTGGAG         | 200 |
|        | PRDM1_ex6_10     | chr6:106105572-106105755 | CCTCAGATGGAGCCCGGA               | TTGGGCTGCACCACATGTT           | 184 |
|        | PRDM1_ex6_11     | chr6:106105686-106105881 | CCTGTAGCCCCACAAGCG               | TTGATCTTGCCGTTCTGCTTC         | 196 |
|        | PRDM1_ex6_9      | chr6:106105475-106105662 | CTCTCCGAGGCTGTGC                 | GCCCCGTAAGGAGAAGG             | 188 |
|        | PRDM1_ex6r_1     | chr6:106104889-106105057 | CCCAAAGAGAGAGTACAGCGTG           | GTAAACGACCCGAGGGTAGAAG        | 169 |
|        | PRDM1_ex6r_3     | chr6:106105035-106105232 | CCTTCTACCCTCGGGTCGTTTAC          | TCCCAGGGCTGCTGTGAG            | 198 |
|        | PRDM1_ex6r_4     | chr6:106105144-106105342 | CATTCCATCCTCCACACTCC             | GGGTGCGTAGCCAGGGTA            | 199 |
|        | PRDM1_ex6r_5     | chr6:106105271-106105468 | CGGGACTCCTACGCTTACTTG            | GTTGTTGATGCCATTCATGCT         | 198 |

|              |                  |                          |                             |                          |                         |     |
|--------------|------------------|--------------------------|-----------------------------|--------------------------|-------------------------|-----|
| Exon 6       | PRDM1_ex6r_6     | chr6:106105375-106105567 | GTACAACGCTCACTACCCCAAGT     | CGAGCTCGGGAGAGAAGTGG     | 193                     |     |
|              | PRDM1_ex6s_2     | chr6:106105819-106106013 | AAGAAACATGACCGGCTACAAGAC    | GATACCCCATGGAAAGCAAGCTA  | 195                     |     |
|              | PRDM1_ex6t_2     | chr6:106104945-106105142 | AAGGAAAGGACCTCTACCGTTCTA    | GGGAGCGAGTGATGTACGTG     | 198                     |     |
|              | PRDM1_ex7_2      | chr6:106106333-106106532 | GCTTGAGAGCAGAGCTAACACAT     | GGTCAGAAGGTCTACCCAGAAA   | 200                     |     |
|              | Exon 7           | PRDM1_ex8b_1             | chr6:106106838-106107027    | CTCCCGTTGGCAACTCTTAATC   | GTGCACAAACTGGGTGAACTTG  | 190 |
|              |                  | PRDM1_ex8b_2             | chr6:106106928-106107124    | TAGCAGCACCAGCAATCTCAAG   | GGTGAACCTTGAGGCTACAGAGA | 197 |
| PRDM1_ex8b_3 |                  | chr6:106107028-106107227 | CTGAAACTGCACAAGCGTCTG       | TCAGCATTGCTACTGATGTCAAAC | 200                     |     |
| PRDM1_ex8b_4 |                  | chr6:106107159-106107306 | GCTGCCCTTGAAGATCTG          | CTCTTTCTGACCACGGCCA      | 170                     |     |
| PRDM1_ex8b_5 |                  | chr6:106107232-106107417 | CTCGAGGACGTGGAGGATG         | AGGCAACTTCATGAGGGGTAGAT  | 186                     |     |
| PRDM1_ex8b_6 |                  | chr6:106107359-106107541 | TCCTCTCCTCAGGGTGCAG         | ACCCTGACTACCAAGTCATAACT  | 183                     |     |
| Exon 2       | TNFAIP3_ex2_2    | chr6:137871260-137871449 | TTTGAGCAATATGCGGAAAGC       | CTGGATGTTTCTGTGATGAGG    | 190                     |     |
|              | TNFAIP3_ex2_2r_1 | chr6:137871141-137871343 | CAGGCAGCTATAGAGGAGTCGT      | TGATGAATGATCCCATTAGTAGGT | 203                     |     |
|              | TNFAIP3_ex2r_1   | chr6:137871354-137871538 | ATGCACCGATACACACTGGA        | ACAGAACAAGTCTTACCGTTCGTT | 185                     |     |
|              | TNFAIP3_ex2r_2   | chr6:137871426-137871623 | GCCCTCATCGACAGAAACATC       | TGATTTGAGTTTGGGCTTGTCTA  | 198                     |     |
| Exon 3       | TNFAIP3_ex3_1    | chr6:137874772-137874962 | TCTGAAAACCTTTGCTGGGTC       | AAGTTGCGTGTGTCTGTTTCCT   | 191                     |     |
|              | TNFAIP3_ex3_2    | chr6:137874881-137875080 | ACATGTGGGGCGTTCAGG          | CCACCATGGAGCTCTGTTAGTAGA | 200                     |     |
| Exon 4       | TNFAIP3_ex4_1    | chr6:137875638-137875814 | CAGGGAGTACAGGATACATTCAAGC   | TTCTGAGGATGTTGCAAAGGAC   | 177                     |     |
|              | TNFAIP3_ex4_2    | chr6:137875676-137875860 | CGCTCCCCTTAGAACTGGAATGA     | GATCCGTGATCTGCAGGCAT     | 185                     |     |
| Exon 5       | TNFAIP3_ex5_1    | chr6:137875918-137876114 | AGTTCAGGTAACAGAGTTCAATGGA   | GCCGAGAACAATGGGGTATC     | 197                     |     |
|              | TNFAIP3_ex5_2    | chr6:137876024-137876219 | TTCCAATTCGCCCTTTG           | ACCCTGATGTTTCAGTGTCTAGTT | 196                     |     |
| Exon 6       | TNFAIP3_ex6_1    | chr6:137877020-137877213 | CCTATGGCCTTGTTTAGTAGAATACTG | GGACGGGGATTCTATCACC      | 194                     |     |
|              | TNFAIP3_ex6_2    | chr6:137877101-137877290 | CAGAGACCGGGGAAGATTTG        | TGACACAGGAGAGAGCTGAACA   | 190                     |     |
| Exon 7       | TNFAIP3_ex7_1    | chr6:137878378-137878570 | TCTTGTGTGTGATTTTGTGATTCTC   | AGGTTCCATGGGATTCTGG      | 193                     |     |
|              | TNFAIP3_ex7r_1   | chr6:137878434-137878632 | TGGATGAAGCTAACTACCAAAGA     | ATGAAGAAGGGGCAGTTGG      | 199                     |     |
|              | TNFAIP3_ex7r_2   | chr6:137878551-137878746 | CCCAGAATCCCATGGAACCT        | GCCATGCCAGGGAGCC         | 196                     |     |
|              | TNFAIP3_ex7r_3   | chr6:137878666-137878865 | CTCAGAGAGGCGGCAAAAAG        | TGGTCTCACTGAACAGAAAAGG   | 200                     |     |
|              | TNFAIP3_ex7r_4   | chr6:137878756-137878939 | CTCTCGGGGAGAAGCCTATG        | GCAACGTTCAAAAATCCGT      | 184                     |     |
|              | TNFAIP3_ex7r_5   | chr6:137878866-137879064 | CTGCCATGAAGTGCAGGAG         | AAGCAAGTACTGCAGATCCCA    | 199                     |     |
|              | TNFAIP3_ex7r_6   | chr6:137878962-137879149 | CCAGCCACGCCCCAGAC           | CGAGGGATCTGACTTGAACG     | 188                     |     |
|              | TNFAIP3_ex7r_7   | chr6:137879071-137879259 | GACTACAGCAGAGGCCTCCTCC      | CTCGTCCCCTCCTGTCC        | 189                     |     |
|              | TNFAIP3_ex7r_8   | chr6:137879178-137879353 | CTTGCCACAGAGCTGGAAC         | ACGTTTGTCTCTGTACTCGATG   | 176                     |     |
|              | TNFAIP3_ex7r_9   | chr6:137879278-137879470 | CTGCGTGTATTTGGGACTCC        | CACGGTAGGCTCTGACAGTTCT   | 193                     |     |
| Exon 8       | TNFAIP3_ex8_1    | chr6:137880005-137880196 | TGTCAGCATCTCTGTATCGGTG      | AACACTTCTGGCAGTATCCTTCA  | 192                     |     |

TNFAIP3



|        |         |                     |                          |                          |                         |                    |
|--------|---------|---------------------|--------------------------|--------------------------|-------------------------|--------------------|
|        |         | TNFAIP3_ex8_2       | chr6:137880109-137880307 | TCCAGGTTCCAGAACCATTTC    | CAGCAAAAAGCATCGAACACACG | 199                |
|        | Exon 9  | TNFAIP3_ex9_1       | chr6:137880964-137881164 | TGTGCTCTCCCTAAGAAATGTGAG | TGGGATGCTGACACTCCAT     | 201                |
|        |         | TNFAIP3_ex9_2       | chr6:137881066-137881263 | CCACACAAAAGCACCTCAAGG    | CATTGCCAAAATGATCACAGG   | 198                |
|        |         | TNFAIP3_ex9r_1      | chr6:137881140-137881328 | CTCTGCATGGAGTGTGAGCAT    | TGTTCCGGTTAGCCATACATCT  | 189                |
|        |         | TNFAIP3_ex9r_2      | chr6:137881244-137881429 | CTGTGATCATTTTGGAATGC     | ACCCTTAAGCCCACTGTTGC    | 186                |
|        |         |                     |                          |                          |                         |                    |
| CARD11 | Exon 5  | CARD11_ex5_1        | chr7:2944146-2944313     | TTGAGCCCTGGTGACATTTG     | GTCAAGGTGAAGGACGACAATA  | 168                |
|        |         | CARD11_ex5_2        | chr7:2944214-2944409     | CGAGTTGGAGGTCTCGGCT      | AAGAAGCAGATGACGCTGACG   | 196                |
|        |         | CARD11_ex5_4r_2     | chr7:2944458-2944630     | GTCCTTGGCCTTATCTGCT      | GAGTGAGTGAATGAATGGCACC  | 173                |
|        |         | CARD11_ex5r_1       | chr7:2944314-2944512     | CAGCTCGTCATTGTAGCTGTCC   | GCACTTCTGATGAACGAGGTC   | 199                |
|        | Exon 6  | CARD11_ex6_1        | chr7:2939667-2939831     | ACCTGGCAGGTTTCATCGT      | CCAAGAAGGAGCAGGTTCTGG   | 165                |
|        |         | CARD11_ex6_2        | chr7:2939789-2939984     | ATTTTCATTCTCCGCTCCAG     | TTCTGAGTGTTCCTTCCACC    | 196                |
|        | Exon 7  | CARD11_ex7_1        | chr7:2938597-2938795     | GTCCTGCTGACACACCACT      | ATCCTGGACATCTTGAACACG   | 187                |
|        |         | CARD11_ex7r_1       | chr7:2938669-2938853     | CCACTCCCACCTTGTCTCG      | AAACCTCCTCCTCCACC       | 185                |
|        | Exon 8  | CARD11_ex8_1        | chr7:2937809-2937991     | GTTGCACTGGACAAAACACTCTG  | CCTGGGAAAGGACTGTGAAATG  | 183                |
|        |         | CARD11_ex8_2        | chr7:2937916-2938104     | CTCCCGCTCCACCTCCTC       | GCAAGAACAGCTTTCAGTCCTGA | 189                |
|        | Exon 9  | CARD11_ex9_1        | chr7:2936990-2937178     | AGGGCCACCTGGCTTC         | GGACAAGTACAGGAAGCAGATCC | 189                |
|        |         | CARD11_ex9_2        | chr7:2937076-2937258     | CTTGCTCTCCAGGTTGACGATG   | CTTCGTCCTCCGCTTCTCCC    | 183                |
| TP53   | Exon 2  | TP53_E00001596491_1 | chr17:7676440-7676622    | TTTCGCTTCCCACAGGTCTC     | CAGCCAGACTGCCTTCCG      | 182                |
|        | Exon 4  | TP53_E00001612188_1 | chr17:7675942-7676103    | ATACGGCCAGGCATTGAAGT     | CCTCCTGGCCCCCTGTC       | 161                |
|        |         | TP53_E00001612188_2 | chr17:7676041-7676202    | GGAAACCGTAGCTGCCTCG      | AAGACCCAGGTCCAGATGAA    | 161                |
|        |         | TP53_E00002359670   | chr17:7676161-7676308    | CAGCCTCTGGCATTCTGG       | CCTGGTCTCTGACTGCTCT     | 147                |
|        | Exon 5  | TP53_E00001255919_5 | chr17:7675043-7675207    | AGCTGCTCACCATCGTA        | CCAACTGGCCAAGACCT       | 164                |
|        |         | TP53_E00001255919_6 | chr17:7675107-7675276    | TGTGCTGTGACTGCTGTAG      | TGCCCTGACTTCAACTCTGT    | 169                |
|        | Exon 6  | TP53_E00001255919_1 | chr17:7674753-7674956    | GGAGGTCAAATAAGCAGCAGG    | AGCATCTTATCCGAGTGAAGG   | 183                |
|        |         | TP53_E00001255919_3 | chr17:7674911-7675088    | TCCAAATACTCCACACGCAAA    | GCTGCCCCACCATGAG        | 177                |
|        | Exon 7  | TP53_E00001665758_1 | chr17:7674114-7674313    | GGGGTCAGAGGCAAGCAG       | CTTGGGCTGTGTTATCTCC     | 199                |
|        | Exon 8  | TP53_E00001789298_3 | chr17:7673685-7673869    | TGTCCTGCTTGCTTACCTCG     | GCCTCTTGCTTCTTTTCT      | 184                |
|        | Exon 9  | TP53_E00001789298_1 | chr17:7673468-7673665    | AGAAAACGGCATTTTGAGTGT    | AAGGGTGCAGTTATGCCTCA    | 197                |
|        |         | TP53_E00001789298_2 | chr17:7673590-7673757    | CTGGTGTGTTGGGCAGT        | ATCTCCGAAGAAAGGGGAG     | 167                |
|        | Exon 10 | TP53_00001404886_13 | chr17:7673266-7673416    | TCTGTATCAGGCAAAGTCATAGAA | GCCTCAAAGACAATGGCTCC    | 150                |
|        |         | TP53_E00001728015_1 | chr17:7670541-7670736    | GGAATCCTATGGCTTCCAACC    | CCCCCTCTGTTGCTG         | 195                |
|        | Exon 11 | TP53_E00001757276_1 | chr17:7669532-7669712    | GACCAAAAACCAAAATGGC      | TCCCTGCTTGTCTCCTAC      | 180                |
|        |         | Exon 1              | B2M_ex1                  | chr15:44711454-44711661  | CGGGCCTTGTCTGATT        | GCAGAGCGGGAGAGGAAG |

|               |         |                       |                          |                             |                               |     |
|---------------|---------|-----------------------|--------------------------|-----------------------------|-------------------------------|-----|
| B2M           | Exon 2  | B2M_ex2_1             | chr15:44715326-44715512  | AATGTAAACACTTGGTGCCTGATA    | ATGGATGAAACCCAGACACA          | 187 |
|               |         | B2M_ex2_2             | chr15:44715423-44715629  | GTA CTCAAAGATT CAGGTTACTCA  | GGGTGAATTCAGTGTAGTACAAGAGA    | 207 |
|               |         | B2M_ex2_3             | chr15:44715456-44715664  | CAGCAGAGAATGGAAAGTCAAAT     | GTTACACACGGCAGGCATAC          | 209 |
|               |         | B2M_ex2_4             | chr15:44715577-44715752  | GTCTTT CAGCAAGGACTGGTCT     | TGACTACTCATACACYACTTMCAGCAG   | 176 |
| CD58          | Exon 2  | CD58_ex2_1            | chr1:116544473-116544655 | TGCCACCAAAGTCATGTTGT        | TTCCAGTTCTGCAACTTTATCC        | 183 |
|               |         | CD58_ex2_2            | chr1:116544381-116544580 | AAATATATGGTGTGTATGGGAAT     | TGATGATGTTAAGTTGRAGARAGTGAGG  | 200 |
|               |         | CD58_ex2_3            | chr1:116544293-116544468 | TGASTTCAGAGCTTTCTCATCYTT    | AACTTATGGAATACTACCAAGCAC      | 176 |
|               |         | CD58_ex2_4            | chr1:116544186-116544367 | ATGAARTGGAATCGCCAAAT        | AAACCCTGACAACAGGTAACATC       | 182 |
|               | Exon 3  | CD58_ex3_1            | chr1:116536169-116536354 | TGCTCAAGGAGTTTGTCTGC        | ATTGGACTTCAATGCTTCCA          | 186 |
|               |         | CD58_ex3_2            | chr1:116536054-116536217 | TCTCCACACTA AACTTGTGCAT     | TCATTTTCCATCTTAAAATATATACTGGT | 164 |
|               |         | CD58_ex3_3            | chr1:116535955-116536133 | CTTATAATGTA CTATGGGATTGTCC  | ATTTACTACCGCTGCTTGG           | 169 |
|               |         | CD58_ex3_4            | chr1:116535892-116536042 | AAATACAGTGTACTCTTAGCAATCCAT | AATTGTGAACCTTGTGTTAGTCACC     | 151 |
| CREBBP        | Exon 2  | CREBBP_ex2_1          | chr16:3850899-3851081    | CATAGAAACGTGGCAGTTGG        | TGGAAGCAGCATCTGGAAC           | 183 |
|               |         | CREBBP_ex2_2          | chr16:3850771-3850980    | GATCTTCTGATGAGCTGATACC      | GTTCCGGCTGCCCTTGAG            | 210 |
|               |         | CREBBP_ex2_4          | chr16:3850563-3850731    | CCTCTGAGCCAGGGAGATT         | TCATGCAGATACCAWGTCCA          | 169 |
|               |         | CREBBP_ex2_5          | chr16:3850482-3850635    | CAAGCACAAAAGCAAGTGG         | GCCCTTGTGAAGCCTGATTA          | 154 |
|               |         | CREBBP_ex2_6          | chr16:3850364-3850541    | ACCCAGGCCTCCTCAATAGT        | GTTAGGGTCTCAGCCAGCA           | 178 |
|               |         | CREBBP_ex2_7          | chr16:3850232-3850441    | AGGAAGGGGAGCTGGAATG         | CGCATTACTCGGAGGGAAA           | 210 |
|               | Exon 5  | CREBBP_ex5_1          | chr16:3791991-3792245    | CAGCCTGTTTGTAAAGTTGAGGA     | TCGCTTGTCACTGGCATT            | 200 |
|               |         | CREBBP_ex5_2          | chr16:3791870-3792062    | TCTCATTGGAAGAACTGCACA       | CTGCACTCCATGGCTCATAA          | 193 |
|               | Exon 6  | CREBBP_ex6_1          | chr16:3782813-3782995    | AAATCATTCTGTTGGCYTCTC       | GCATGGAGCTGGGGTCTAT           | 183 |
|               |         | CREBBP_ex6_2          | chr16:3782693-3782887    | TTGGTTCTGTTGGCACAGG         | TGAGAGTCTCATCTGCTGGT          | 195 |
|               |         | CREBBP_ex6_3          | chr16:3782618-3782806    | CCTATGCTGCTCTCGGACTC        | CCATCACTCCATTCCCTTTG          | 189 |
|               | Exon 8  | CREBBP_ex8            | chr16:3780701-3780906    | GGATGAAGTGTCTTTATTTCTCCT    | ACATCTATGAAACTGCAAACTGTTAC    | 206 |
|               | Exon 12 | CREBBP_ex12_1         | chr16:3774592-3774758    | GCAAGTTGTAATTCTGTTTTCTG     | TCATCTGGACAGAGTGGTTCA         | 167 |
|               |         | CREBBP_ex12_2         | chr16:3774521-3774673    | ATGTCCTTGGGGAACGTC          | CATGTGAGAGGGAGGGCTA           | 153 |
|               | Exon 16 | CREBBP_ex16_1         | chr16:3767820-3768012    | GGTTTTAACAACTGTTTTAGGC      | TTCATCCACTCCATTGGTTC          | 193 |
|               |         | CREBBP_ex16_2         | chr16:3767734-3767904    | GGAGGAGGATTTGCAAGGA         | TGCCAAGGAGATGTTGACTG          | 171 |
|               |         | CREBBP_ex16_3         | chr16:3767680-3767867    | GAAACAGACATAGCAGAGCAGAAA    | AAGCAGCATGCTTTAATAAGGTAA      | 188 |
|               | Exon 17 | CREBBP_ex17_1         | chr16:3758853-3759001    | AGTGTCITTTCTTGATGTTTTCTG    | CTGGAATTCGAGGAGCTG            | 149 |
|               |         | CREBBP_ex17_2         | chr16:3758782-3758944    | CCTCATGCCAACCTAGAAG         | CAAGAGATAAAACAATGGACTCA       | 163 |
|               | Exon 18 | CREBBP_ex18_1         | chr16:3757941-3758115    | GCCAGATGAGACTGGCATT         | GAGCCAGACGTGTCAC              | 175 |
| CREBBP_ex18_2 |         | chr16:3757820-3758006 | ATCAAGCGGAAGCTGGAC       | AGCAATATCCAAGGACTGC         | 187                           |     |

|         |               |                         |                               |                             |     |
|---------|---------------|-------------------------|-------------------------------|-----------------------------|-----|
|         | CREBBP_ex18_3 | chr16:3757702-3757888   | TTTGAGTAAGCTTGCAGAGG          | TGCACATATGCACTCCCAGT        | 187 |
| Exon 20 | CREBBP_ex20   | chr16:3751676-3751836   | TTCACCCAAGTATGGCCTTC          | TTTAAGGTCACCTCCCTCA         | 161 |
| Exon 23 | CREBBP_ex23   | chr16:3744817-3744991   | CAGTCTYATCATACCRCTATTATTTTGC  | CCAAAGAACAATGGGGACAA        | 175 |
| Exon 24 | CREBBP_ex24_1 | chr16:3740416-3740575   | TCACCTRCTCTCTGGACT            | CTTGACCTCCACCYTCTTGT        | 160 |
|         | CREBBP_ex24_2 | chr16:3740318-3740489   | GCCAGAATCACCTGAAGC            | CAAGAGCTTTGCAGAGAGCA        | 172 |
| Exon 26 | CREBBP_ex26   | chr16:3738531-3738702   | CTGAGTTAAACATGTGCTCCTT        | AGTTCCAAATAATTTAATCCAAACTCA | 172 |
| Exon 27 | CREBBP_ex27_1 | chr16:3736654-3736835   | TGTGTGCGTGGGTCCTG             | TAGTCATGGATGATCCGCTCT       | 182 |
|         | CREBBP_ex27_2 | chr16:3736598-3736757   | CATTGCCACCCACCTGAT            | ATCCTCCCCTCAGTTGTGAC        | 160 |
| Exon 28 | CREBBP_ex28_1 | chr16:3736116-3736316   | ATGGGACTCTGCCACACC            | CTAACACATTGGGCCAGAAAT       | 201 |
|         | CREBBP_ex28_2 | chr16:3736008-3736190   | AAGCAACTGAAGACAGGCTCA         | GCAATGGAGCTCAGAGAAGG        | 183 |
| Exon 29 | CREBBP_ex29_1 | chr16:3731810-3731973   | ACTTGCCTGGTCTCACAGC           | TGGGACAGGTCATTGGACA         | 164 |
|         | CREBBP_ex29_2 | chr16:3731679-3731883   | AAGAACAAAAGCAGCATCAGC         | CCACCACAGACCTGCACAC         | 205 |
| Exon 30 | CREBBP_ex30_1 | chr16:3731376-3731577   | AGCCACCTGCCTATTCTGC           | CCATCCATGAGGTCACAGC         | 202 |
|         | CREBBP_ex30_2 | chr16:3731276-3731477   | GCAGGTCTTCTCGTGATCC           | GTGCAGCTCCACCAGCAT          | 202 |
|         | CREBBP_ex30_3 | chr16:3731183-3731360   | CACCCTMGCCAGAGACAA            | AGGGCCTACCTCYCACAC          | 178 |
|         | CREBBP_ex30_4 | chr16:3731076-3731243   | CAACGAGTGAAGCACCA             | GAGTCAGTGCAGCCACCAT         | 168 |
| Exon 2  | EP300_ex2_1   | chr22:41117106-41117290 | TGCTTATTGAGAACAATATAGAGCAGT   | TGTCTGAAGCTGATTAATATCACCAC  | 185 |
|         | EP300_ex2_2   | chr22:41117209-41117389 | GGAGCAGGACTTACCAGATGA         | GCCACCAACTCCCATATTGA        | 181 |
|         | EP300_ex2_3   | chr22:41117321-41117520 | AAACATAAACAGCTGTGAGAATTGC     | GGTCCACTAGTGCCCATCC         | 200 |
|         | EP300_ex2_4   | chr22:41117428-41117580 | TCCTGGATTAGGTTTGATAAATAGC     | ATGGCAGGCTGATTTACTGG        | 153 |
|         | EP300_ex2_5   | chr22:41117482-41117659 | CTTGACTTCTCCCAACATGG          | ATTAGGCATTATCCCTTGTTCA      | 178 |
|         | EP300_ex2_6   | chr22:41117585-41117768 | ATGAACACAGGGATGAATGC          | CCTGCTGAAGAGGCTCAGTC        | 184 |
|         | EP300_ex2_7   | chr22:41117698-41117889 | ACAGAATATGCAGTACCCAAACC       | ACCCTCCATCCATCATGACA        | 192 |
| Exon 5  | EP300_ex5_1   | chr22:41129807-41129999 | CTTATTAAGTGGTCAACAAGTTAGCTATT | TTGATTTCTTATCACCAGCATT      | 193 |
|         | EP300_ex5_2   | chr22:41129926-41130115 | ACTGGAAGAATTGTACAAGACATGA     | TTCAACATAGTACAACACCACAGG    | 190 |
| Exon 6  | EP300_ex6_1   | chr22:41131292-41131488 | CGTAACAATAATTTTGTGGGGTTT      | GGGATCAATCTGACTAACAGTGC     | 197 |
|         | EP300_ex6_2   | chr22:41131411-41131581 | GGACTTGGAATCCTAGCTCTCT        | CTGCTGGTTCTTTGCTTGC         | 171 |
|         | EP300_ex6_3   | chr22:41131508-41131683 | ATGCAGCTCTGGACTACCC           | TCATTTACTRACACAACCAATACCA   | 176 |
| Exon 9  | EP300_ex9_1   | chr22:41140093-41140242 | ATTAATGCTGACATGATATTACAGTGG   | TTCATACATGTCCCCTTCAACTT     | 150 |
|         | EP300_ex9_2   | chr22:41140173-41140364 | TGCTTTAAAAGACAGACGGATG        | GTGTCCYCCGTCTGAAGC          | 192 |
| Exon 14 | EP300_ex14_1  | chr22:41149656-41149849 | CTTTGTTAATCAGTTTGTGCTCTAAA    | GGAAGCTGGGGACAGTGAAT        | 194 |
|         | EP300_ex14_2  | chr22:41149761-41149940 | GCACAAATGTCTAGTTCTTCTG        | CTGCTGAGCCCCTATGCTT         | 180 |
|         | EP300_ex14_3  | chr22:41149855-41150030 | CAGCTCTTCATCAGAATTCACC        | CCTTGGAGGGGGATGTAGAG        | 176 |

EP300

|              |         |                           |                           |                               |                        |     |
|--------------|---------|---------------------------|---------------------------|-------------------------------|------------------------|-----|
|              |         | EP300_ex14_4              | chr22:41149961-41150131   | AGCCCCTGTTCTACACCTC           | TGTGSGCRAGGCTGCTG      | 171 |
|              |         | EP300_ex14_5              | chr22:41150077-41150274   | CTTCACTTCTGCTGCACCT           | ATGGAAATGGCCAGAAGTA    | 198 |
|              | Exon 27 | EP300_ex27_1              | chr22:41170331-41170516   | ACTTGTGGTTTAAATGTAGCCTTC      | CATTCTGCAGTCGCTTG      | 186 |
|              |         | EP300_ex27_2              | chr22:41170406-41170614   | TTACACAACAGGGCATATTTGG        | TCCAGATCTAYTGTACAGACCT | 209 |
|              | Exon 28 | EP300_ex28_1              | chr22:41172436-41172633   | TCTGTATAATCAATGKTTTAAAGAACATA | TCGTTTTCTCTTCTTCTCCT   | 198 |
|              |         | EP300_ex28_2              | chr22:41172563-41172760   | GTGATTTCTGGCCAATGTT           | CCTGAAAGCTTTAAACCCAAT  | 198 |
|              | Exon 29 | EP300_ex29_1              | chr22:41173497-41173701   | GCTAGTAAATAAGTTACAGGCATAAGATT | CCCTACTCAGGCTGCTTATT   | 205 |
|              |         | EP300_ex29_2              | chr22:41173630-41173839   | AGGGAGACAGCAAAAATGCTAA        | ATGCCTGGCCAGAAATCTT    | 210 |
|              | Exon 30 | EP300_ex30_1              | chr22:41176143-41176325   | CCAGGAGGCAGAGGTTGTAGT         | GGATGAGAGGATCAGGATCAA  | 183 |
|              |         | EP300_ex30_2              | chr22:41176241-41176419   | TTTCAGGCTTCTTTGTGATCC         | GTGGACCACTGGGCTCTTC    | 179 |
|              |         | EP300_ex30_3              | chr22:41176327-41176521   | CTGCGATCTGATGGATGGT           | ACAGTACAGTGCCAGCGTGT   | 195 |
|              |         | EP300_ex30_4              | chr22:41176442-41176622   | CACACGCAGAGCCAGGAC            | GCATCCCACAGGCCTCTAT    | 181 |
| EZH2         | Exon 12 | EZH2_ex12                 | chr7:148816603-148816799  | TGTGACTGTGCCTCTTGTCAG         | CCAACAACAGCCCTTAGGAA   | 197 |
|              | Exon 16 | EZH2_ex16_1               | chr7:148811614-148811815  | CAGTGATAGCTTTTGTTCATTCTG      | CAGTGCCTTACCTCTCCACAG  | 202 |
|              |         | EZH2_ex16_2               | chr7:148811527-148811717  | CTATTGCTGGCACCATCTGA          | TCCAATCAAACCCACAGACTT  | 191 |
|              | Exon 18 | EZH2_ex18                 | chr7:148809249-148809422  | TCACTGGGCTGTGCTTACTTT         | TTCAAGTCCATCATCACAGGA  | 174 |
| KDM2B        | Exon 4  | KDM2B_ex4_1               | chr12:121574541-121574697 | GGGAAAGGATCTCTTTGGAA          | ACTTACCACTAGGAGTTTGACG | 157 |
|              |         | KDM2B_ex4_2               | chr12:121574465-121574608 | CTCCTCTTCCCCAGGATG            | GTCTAAATGGGCAGGTGGTG   | 144 |
|              | Exon 9  | KDM2B_ex9_1               | chr12:121521020-121521216 | CTCTTCTCCACTCCCTGCAC          | GCATGGGCACGTTAAAGC     | 197 |
|              |         | KDM2B_ex9_2               | chr12:121520905-121521110 | CCCACCCAGGTTGGAT              | TATGACCTGTCCCACACACC   | 206 |
|              | Exon 14 | KDM2B_ex14                | chr12:121445247-121445437 | GTTCTCCCTGGCTCCTCAG           | CACCACCTGTCCCCTG       | 191 |
|              | Exon 23 | KDM2B_ex23_1              | chr12:121430319-121430507 | TGGCCTTACACCTCACAT            | ACTTGCCAAACTGGACACT    | 189 |
| KDM2B_ex23_2 |         | chr12:121430262-121430435 | CTTCAAACGCTGTGGAAACA      | CCCGTATTACATACTTATCCTTGG      | 174                    |     |
| MEF2B        | Exon 3  | MEF2B_ex3_1               | chr19:19149332-19149528   | GCATGTTGAGGAAGGGTTA           | GCGCTGTTGAAGATGATGAG   | 197 |
|              |         | MEF2B_ex3_2               | chr19:19149207-19149411   | AAGTTCGGGCTGATGAAGAA          | GGAGGAGGACCTGGGGTA     | 205 |
|              | Exon 4  | MEF2B_ex4                 | chr19:19147679-19147869   | GGGTAAGGGTCTACCCTGTTGT        | GGCCAGGGAGTCACTT       | 191 |
|              | Exon 5  | MEF2B_ex5                 | chr19:19146993-19147204   | CCATCCCTTCTACCCACA            | AGCCCCTCAGGACCTCAC     | 212 |
|              | Exon 6  | MEF2B_ex6                 | chr19:19146709-19146916   | GGCCTGCCTGTCTCTCT             | TCATCAGCCCTGCCACAC     | 208 |
|              | Exon 7  | MEF2B_ex7                 | chr19:19146478-19146690   | GGGTGTGGCCTCAGTTT             | GTGGGAGGGTGTGGAACC     | 213 |
|              | Exon 5  | MLL2_ex5_1                | chr12:49054026-49054202   | TGCCTGAACTGTTTGTCTGG          | TTTTCATGGATAGGAAGGAACC | 177 |
|              |         | MLL2_ex5_2                | chr12:49053923-49054091   | CTGGATGTCCACGGCTTTAC          | CCAAGGCACATTTGGTCTCT   | 169 |
|              | Exon 6  | MLL2_ex6_1                | chr12:49053551-49053736   | ATTCTGTGCCATGGAGTG            | CAGGCCCCGTGATAGTGAT    | 186 |
|              |         | MLL2_ex6_2                | chr12:49053426-49053632   | GCTGTGCAGTGTGAGG              | CCCTAACCTGTGTTGTCCTA   | 207 |

MLL2

|         |              |                         |                            |                          |     |
|---------|--------------|-------------------------|----------------------------|--------------------------|-----|
| Exon 7  | MLL2_ex7_1   | chr12:49053216-49053412 | CAGTCGGAGAAGGCCTGTTA       | CCAAGAGTGAGCAGGCAGTT     | 197 |
|         | MLL2_ex7_2   | chr12:49053156-49053324 | CAGGAAACCTGGGAATGACT       | GCTGTAGCAGACACAGTTAGGG   | 169 |
| Exon 13 | MLL2_ex13_1  | chr12:49048678-49048845 | CCCAACACCAAAGAGGAAAG       | TCTGTGTTGGAGAAGAGAACCA   | 168 |
|         | MLL2_ex13_2  | chr12:49048600-49048776 | CCATCAGGTTGCTGACATTG       | CCTCTACCAAACACACACATAC   | 177 |
| Exon 14 | MLL2_ex14    | chr12:49047947-49048148 | TTGTAGCGTCATAGTAGACTGGATCT | CTTGGGCCTGAACTCAC        | 202 |
| Exon 17 | MLL2_ex17    | chr12:49046000-49046196 | TCCTCCAGTCTCTGTTCTCCA      | GGTCTGTCCAAAGCAAG        | 197 |
| Exon 20 | MLL2_ex20    | chr12:49044385-49044560 | TTCTGATTTGCCTCCATCTCTT     | CCCATCCAGGACCTCAC        | 176 |
| Exon 21 | MLL2_ex21    | chr12:49044135-49044339 | AGCGGCTTCTCATCCACA         | CCCTGGGTCTCTTAGCATT      | 205 |
| Exon 23 | MLL2_ex23_1  | chr12:49043650-49043827 | CCTGCAGGGCATGAAGAA         | GGAGTTCCTTCTTTCTGAGC     | 178 |
|         | MLL2_ex23_2  | chr12:49043574-49043783 | GGAAGCCTTCTTTGGGAAG        | CCAGCTCCTAAGCCAGAAGA     | 210 |
| Exon 25 | MLL2_ex25    | chr12:49043017-49043228 | CCATCCTGGCCTTGACC          | CCTCCTCCTTCTCCATAGAA     | 212 |
| Exon 26 | MLL2_ex26    | chr12:49042717-49042928 | TCACCTGAACCTCCAGTCTT       | TCAGACCACTCCACCTGTA      | 212 |
| Exon 32 | MLL2_ex32_1  | chr12:49039463-49039664 | TGATTGGAGTAGRATGGGCTTAT    | CGACTCAGCTGCTCAAAGG      | 202 |
|         | MLL2_ex32_2  | chr12:49039380-49039540 | AGCAGCTGCAGGAGCAGT         | AAGGTGGAGCAAACCTTCAATA   | 161 |
| Exon 33 | MLL2_ex33    | chr12:49039203-49039395 | AAGTTGCTCCACCTTCATC        | GAACCTCTGGAGCCTCAC       | 193 |
| Exon 35 | MLL2_ex35    | chr12:49034770-49034955 | CTTGTTCTCCCTCTCCA          | GGGAAAGAAAAGGGCCAAC      | 186 |
| Exon 36 | MLL2_ex36    | chr12:49034558-49034753 | GGCTCCCCTCCCTACTTGT        | TCCTACTCCCACCTGACCAC     | 196 |
| Exon 42 | MLL2_ex42_2  | chr12:49030225-49030432 | TGAGTAACCCGCCGACAC         | GGTTTGGACTCCAGCTACCA     | 208 |
| Exon 44 | MLL2_ex44_1  | chr12:49029127-49029280 | AGTCTGCAGGGCTGTAGCAA       | GGCCTGAGCCAGATGAG        | 154 |
|         | MLL2_ex44_2  | chr12:49028984-49029193 | CCAGCTTCATCCCCTGAG         | AACACTTGCCGCCTCTC        | 210 |
| Exon 46 | MLL2_ex46    | chr12:49027990-49028199 | AGCTCACCTCAGACACTTGG       | GCTTCCCTGCCACACTCA       | 210 |
| Exon 48 | MLL2_ex48_10 | chr12:49026190-49026399 | ACAGCTGCTGCCTACCA          | GAGGCGTCAGTGAAGACCAG     | 210 |
|         | MLL2_ex48_11 | chr12:49026137-49026301 | ACAATCRTCGCTGCTGCTAT       | ACTTTTCCCATTCCATATTATCCA | 165 |
|         | MLL2_ex48_2  | chr12:49027009-49027213 | CTTCCCCCTTGGCACCT          | CGCACTCCTTTCCATTCTT      | 205 |
|         | MLL2_ex48_3  | chr12:49026922-49027120 | CTCTGCCACTGGCCTCAT         | TGCTCCATAAACTCTGCCACT    | 199 |
|         | MLL2_ex48_4  | chr12:49026792-49026990 | GCTGCTGACCATCCAGAAG        | CACCCACAGGTCCAGGTC       | 199 |
|         | MLL2_ex48_5  | chr12:49026683-49026866 | TTCTGTCATGAGGAGGGTGA       | ACAGGGAGCACTTGGTTAGC     | 184 |
|         | MLL2_ex48_6  | chr12:49026572-49026772 | GGTCCACGGAGGTGTATGAG       | GCATGGTCTTGTCTTGAAGA     | 201 |
|         | MLL2_ex48_7  | chr12:49026483-49026667 | CCACCAGCAGCTGCAATC         | CTCGTCCCGCTCAATGTAGA     | 185 |
|         | MLL2_ex48_8  | chr12:49026360-49026569 | TGTCCAATGCATAAGATCAAGG     | GGCACTATGAAAGTCAGCCATC   | 210 |
| Exon 51 | MLL2_ex48_9  | chr12:49026304-49026464 | ATCATTAGCGGGGAGAAC         | GTGCGGAGGCTCCAATAG       | 161 |
|         | MLL2_ex51_1  | chr12:49022759-49022920 | GGTCTGAGGGAGAGCTGTCTT      | CGCCGGTACTGAGATGACTT     | 162 |
|         | MLL2_ex51_2  | chr12:49022653-49022843 | AGGCATATCAGAGCACCTTCA      | CTCGATAACCATTGTGTGCTTT   | 191 |

|            |             |                         |                           |                           |                          |     |
|------------|-------------|-------------------------|---------------------------|---------------------------|--------------------------|-----|
|            |             | MLL2_ex51_3             | chr12:49022550-49022753   | GCACCGAATGGAAGAACAA       | GCAGACTATGCACCACAATGG    | 204 |
| RANK       | Exon 2      | RANK_E2                 | chr18:62348143-62348352   | TGCTGACCTCAGTGTCTTT       | CGCGTCTATCCAATTTCTTTT    | 210 |
|            | Exon 3      | RANK_E3                 | chr18:62349782-62349956   | GGTTGCATTTTTCTCCCTCA      | ACTGACAGGACGGGCTCAC      | 175 |
|            | Exon 4      | RANK_E4                 | chr18:62354360-62354560   | TGGCCACTGACCTGTCTCTT      | GACAGACGCAMACATCCAAC     | 201 |
|            | Exon 5      | RANK_E5                 | chr18:62358204-62358373   | TTTGTGGTCTGTCTGGGTTG      | CCATCTCTTCTGACTCCTTTGTT  | 170 |
|            | Exon 6      | RANK_E6                 | chr18:62359911-62360091   | CAAGCWTATAAAAACCAAGCACTG  | CTGGGGCACATCTATCAACC     | 181 |
|            | Exon 7      | RANK_E7                 | chr18:62361611-62361820   | GATTTGTTTTCAAYTGCGTAAA    | TTGCAAAAACCACCATAGACA    | 210 |
|            | Exon 8      | RANK_E8                 | chr18:62366674-62366833   | CTTGAAGTCTTATCCTTGCTTT    | TGTGACTAGGATGGCTCTACCA   | 160 |
|            | Exon 9      | RANK_E9_P1              | chr18:62368671-62368870   | TGCTCTGCCTTCTGAATGT       | TAGGGACCACCTCTACACA      | 200 |
|            |             | RANK_E9_P2              | chr18:62368768-62368949   | GTGTCTTACTGCTGACTCTGGA    | GGGCATCTGTCTGAAGCTGT     | 182 |
|            |             | RANK_E9_P3              | chr18:62368881-62369084   | GAAGATGSCAGGATGCTCTC      | GCACTGGCTTAAACTGTCATTC   | 204 |
|            |             | RANK_E9_P4              | chr18:62369001-62369168   | TTCTCACTGAGCTGGAAG        | GGACATGGGAGTCCAATCA      | 168 |
|            |             | RANK_E9_P5              | chr18:62369095-62369283   | CACAGAGCMCAGTGGGTTCA      | CCTCCCAGGAGGGTTC         | 189 |
|            |             | RANK_E9_P6              | chr18:62369226-62369421   | AGCCCCAGCCCAACT           | GGAGCCTCCCATCAGC         | 196 |
| RANK_E9_P7 |             | chr18:62369346-62369547 | GGCCTTCCCCTGAAGA          | CCCAAACCTGTACCAAGAA       | 202                      |     |
| Exon 10    | RANK_E10_P1 | chr18:62384671-62384851 | CCCCGGAACCTTCTCT          | CTGCGAGGTCTGGCTGA         | 186                      |     |
|            | RANK_E10_P2 | chr18:62384761-62384912 | TGGAACAGTAACBCCACGTTT     | GCGCCAGGTCTCCTC           | 152                      |     |
|            | RANK_E10_P4 | chr18:62384919-62385074 | ACTCCTTCGCSGGGAAC         | CCCTGGCTCCGAGCTT          | 156                      |     |
| TRAF3      | Exon 2      | TRAF3_E2_P1             | chr14:102870109-102870312 | CTTTTGCTTCCCAAAGCTG       | TCCTTGTTCAGGGACAAAAAC    | 204 |
|            |             | TRAF3_E2_P2             | chr14:102870206-102870408 | AGTCSAGTAAAAAGATGGACTCTC  | CCCACACTCGGTCTGCTT       | 203 |
|            |             | TRAF3_E2_P3             | chr14:102870340-102870527 | GTGGAGGACAAGTACAAGTGTGA   | TTTTTAGAGAAACGAATGAAGGA  | 188 |
|            | Exon 3      | TRAF3_E3                | chr14:102871869-102872030 | CAAGAAAGGGACTTCCACTCTAA   | TGTGAAAAGTATTACCCAGCTGAA | 162 |
|            | Exon 4      | TRAF3_E4_P1             | chr14:102875548-102875702 | TTTGCCTTGCCAAAGTAGC       | CTGCACAACCTCTGCTTTC      | 155 |
|            |             | TRAF3_E4_P2             | chr14:102875632-102875817 | GGATAATTGCTGCAAGAGAGAAA   | TGCCACATCCTACTGACCAC     | 186 |
|            | Exon 5      | TRAF3_E5_P1             | chr14:102876261-102876460 | CATTTCTTTAGGGTTTCATTGC    | CCTTCTCCACGTGGTCTCG      | 200 |
|            |             | TRAF3_E5_P2             | chr14:102876367-102876549 | AAAAATGATTGCCATTTTGAAG    | CCTGYGGAATGGGAGGAC       | 183 |
|            | Exon 6      | TRAF3_E6                | chr14:102886131-102886321 | GGGACTGAAGGAAGACAGGTT     | CACGCARCCCTGAGGA         | 191 |
|            | Exon 7      | TRAF3_E7                | chr14:102889529-102889728 | TGCCACAACCTCACGTCTCTT     | GGAGTCCAGAGCTTGCATGT     | 156 |
|            | Exon 8      | TRAF3_E8                | chr14:102891297-102891448 | TGAATGCCTCACATGTTTGC      | TCCCATAGCAGCAGGAAAG      | 152 |
|            | Exon 9      | TRAF3_E9_P1             | chr14:102897162-102897365 | GCTAACAGAAGGCCTATATTGTGAA | CATTTCTTTTGTCTCTCAATTTT  | 204 |
|            |             | TRAF3_E9_P2             | chr14:102897264-102897447 | TCCTTGTTGCAGAATGAAAGTG    | CAAGCTCCTCCACCTTTG       | 184 |
|            | Exon 10     | TRAF3_E10_P1            | chr14:102903228-102903429 | TGCTTTTTAACACCTTTGGTTTG   | CTGTGTTCCGAGCCACTTG      | 202 |
|            |             | TRAF3_E10_P2            | chr14:102903333-102903524 | GCAGACAGCATGAAGAGCAG      | TGTACCTAACATAGCCCTCATCC  | 192 |

|         |              |                           |                      |                      |     |
|---------|--------------|---------------------------|----------------------|----------------------|-----|
| Exon 11 | TRAF3_E11_P1 | chr14:102905182-102905364 | TCATTCACCAAACCCTCCTC | CTTCCGCCGCTTGTAGTC   | 183 |
|         | TRAF3_E11_P2 | chr14:102905278-102905483 | GACATGGACCTGCGCTTC   | GTCCCCTTCCCCTCC      | 206 |
|         | TRAF3_E11_P3 | chr14:102905402-102905584 | GCCAGCCTTTCTACTGTT   | ACCCCTGATCCATCAGCAT  | 183 |
|         | TRAF3_E11_P4 | chr14:102905502-102905702 | TGTCATCATGCGTGGAGAAT | ACAGTTTGGGCCACAAAGAC | 201 |
|         | TRAF3_E11_P5 | chr14:102905634-102905827 | CAGCTTCAAGAAGCCCACTG | CAGAGGAGTTGCCTTCTGCT | 194 |

The CS1 tag (ACACTGACGACATGGTTCTACA) was added to the 5' of the forward primer and the CS2 tag (TACGGTAGCAGAGACTTGGTCT) was added to the 5' of the reverse primer and used for barcoding.

**Fluidigm PCR conditions**

95°C 15 sec, 80°C 30 sec, 60°C 30 sec, 72°C 1 min, 8 cycles of 95°C 15 sec, 60°C 30 sec, 72°C 1 min, and 5 cycles of 95°C 15 sec, 80°C 30 sec, 60°C 30 sec, 72°C 1 min

**Supplementary Table S3:** Immunoglobulin heavy chain rearrangements in MALT lymphomas

| Sample   | IGHV       | Homology | IGHJ  | IGHD     |
|----------|------------|----------|-------|----------|
| M_CU_001 | IGHV1-18   | 96.02%   | IGHJ2 | IGHD2-8  |
| M_GA_012 | IGHV1-18   | 82.70%   | IGHJ3 | IGHD2-21 |
| M_GB_001 | IGHV1-2    | 98.10%   | -     | -        |
| M_SA_001 | IGHV1-46   | 97.83%   | -     | -        |
| WES_SA14 | IGHV1-69   | 96.84%   | IGHJ4 | IGHD5-24 |
| M_SA_002 | IGHV1-69   | 88.44%   | IGHJ4 | IGHD5-24 |
| M_SA_006 | IGHV1-69   | 88.24%   | IGHJ4 | IGHD4-11 |
| M_SA_010 | IGHV1-69   | 99.44%   | IGHJ4 | IGHD5-24 |
| M_SA_018 | IGHV1-69   | 96.08%   | IGHJ2 | -        |
| M_SA_021 | IGHV1-69   | 96.65%   | IGHJ4 | IGHD3-10 |
| M_SA_045 | IGHV1-69   | 96.55%   | -     | -        |
| M_SA_046 | IGHV1-69   | 91.33%   | IGHJ4 | IGHD3-22 |
| WES_SA3  | IGHV1-69   | 95.92%   | IGHJ4 | IGHD3-10 |
| WES_SA5  | IGHV1-69   | 95.45%   | -     | -        |
| WES_SA6  | IGHV1-69   | 91.02%   | IGHJ4 | IGHD4-11 |
| M_TO_001 | IGHV1-69   | 90.81%   | IGHJ4 | IGHD2-21 |
| M_OA_009 | IGHV2-26   | 87.13%   | IGHJ6 | IGHD4-23 |
| M_OA_094 | IGHV2-5    | 95.05%   | IGHJ5 | IGHD3-9  |
| M_OA_056 | IGHV2-70   | 100%     | IGHJ4 | IGHD5-24 |
| M_OA_006 | IGHV3-11   | 92.35%   | -     | -        |
| M_OA_085 | IGHV3-11   | 90.31%   | IGHJ3 | IGHD1-1  |
| M_GA_009 | IGHV3-15   | 98.43%   | IGHJ4 | IGHD6-6  |
| M_SA_007 | IGHV3-15   | 96.07%   | IGHJ4 | IGHD3-3  |
| M_LU_002 | IGHV3-21   | 98.37%   | IGHJ6 | IGHD1-26 |
| M_OA_016 | IGHV3-21   | 98.91%   | IGHJ6 | IGHD3-3  |
| M_OA_007 | IGHV3-23   | 91.30%   | IGHJ5 | IGHD4-11 |
| M_OA_020 | IGHV3-23   | 93.29%   | IGHJ4 | IGHD1-14 |
| M_OA_027 | IGHV3-23   | 93.41%   | IGHJ4 | IGHD1-14 |
| M_OA_043 | IGHV3-23   | 94.35%   | IGHJ4 | IGHD3-16 |
| M_OA_045 | IGHV3-23   | 89.18%   | IGHJ4 | IGHD3-10 |
| M_OA_048 | IGHV3-23   | 92.81%   | IGHJ6 | IGHD6-6  |
| M_OA_054 | IGHV3-23   | 92.21%   | IGHJ4 | IGHD1-14 |
| M_OA_061 | IGHV3-23   | 92.31%   | IGHJ4 | IGHD1-14 |
| M_OA_066 | IGHV3-23   | 91.53%   | IGHJ4 | IGHD2-15 |
| M_OA_081 | IGHV3-23   | 93.41%   | IGHJ4 | IGHD3-10 |
| M_OA_082 | IGHV3-23   | 93.91%   | IGHJ4 | IGHD3-16 |
| M_OA_083 | IGHV3-30   | 91.50%   | IGHJ4 | IGHD2-15 |
| M_OA_093 | IGHV3-30   | 92.83%   | IGHJ4 | IGHD5-18 |
| M_SA_035 | IGHV3-30   | 82.51%   | -     | -        |
| M_GA_025 | IGHV3-30   | 96.47%   | -     | -        |
| M_OA_049 | IGHV3-30   | 87.50%   | IGHJ6 | IGHD5-18 |
| M_OA_078 | IGHV3-30   | 86.81%   | -     | -        |
| M_OA_079 | IGHV3-30-3 | 94.78%   | IGHJ4 | IGHD3-10 |
| M_LU_025 | IGHV3-33   | 94.90%   | IGHJ4 | IGHD2-15 |
| M_OA_050 | IGHV3-33   | 87.10%   | IGHJ3 | IGHD5-24 |
| M_OA_069 | IGHV3-33   | 90.53%   | -     | -        |
| M_OA_004 | IGHV3-43   | 93.98%   | IGHJ5 | IGHD2-21 |



|          |            |        |       |          |
|----------|------------|--------|-------|----------|
| M_GA_027 | IGHV3-48   | 94.74% | -     | -        |
| M_OA_026 | IGHV3-48   | 93.94% | -     | -        |
| M_OA_055 | IGHV3-48   | 94.02% | IGHJ4 | IGHD3-3  |
| M_OA_098 | IGHV3-48   | 97.58% | IGHJ6 | IGHD4-17 |
| M_SA_050 | IGHV3-48   | 94.08% | -     | -        |
| M_OA_099 | IGHV3-53   | 94.72% | IGHJ5 | IGHD4-23 |
| M_CU_005 | IGHV3-7    | 89.01% | -     | -        |
| M_OA_015 | IGHV3-7    | 89.16% | IGHJ5 | IGHD1-14 |
| M_OA_051 | IGHV3-7    | 83.51% | -     | -        |
| M_OA_058 | IGHV3-7    | 92.16% | -     | -        |
| M_OA_059 | IGHV3-7    | 94.04% | IGHJ6 | IGHD6-19 |
| M_OA_097 | IGHV3-7    | 94.42% | IGHJ6 | IGHD6-13 |
| M_SA_012 | IGHV3-7    | 97.02% | IGHJ3 | IGHD3-22 |
| M_SA_038 | IGHV3-7    | 96.15% | IGHJ3 | IGHD3-22 |
| M_OA_030 | IGHV3-73   | 96.06% | -     | -        |
| M_LU_003 | IGHV3-74   | 93.98% | IGHJ6 | IGHD5-18 |
| M_LU_029 | IGHV3-74   | 93.26% | -     | -        |
| M_OA_041 | IGHV3-74   | 95.97% | IGHJ4 | IGHD3-3  |
| M_OA_057 | IGHV3-74   | 94.76% | IGHJ4 | IGHD1-14 |
| M_OA_102 | IGHV3-74   | 91.94% | IGHJ3 | IGHD6-13 |
| M_GA_019 | IGHV3-9    | 94.89% | IGHJ5 | IGHD4-11 |
| M_OA_053 | IGHV3-9    | 93.90% | -     | -        |
| M_OA_003 | IGHV4-31   | 94.95% | IGHJ5 | IGHD2-15 |
| M_OA_100 | IGHV4-31   | 93.23% | IGHJ6 | IGHD2-21 |
| M_GA_010 | IGHV4-34   | 95.10% | IGHJ4 | IGHD6-13 |
| M_GA_011 | IGHV4-34   | 77.55% | IGHJ6 | IGHD3-22 |
| M_GA_017 | IGHV4-34   | 95.03% | IGHJ4 | IGHD5-18 |
| M_OA_017 | IGHV4-34   | 100%   | -     | -        |
| M_OA_019 | IGHV4-34   | 94.74% | IGHJ5 | IGHD2-15 |
| M_OA_029 | IGHV4-34   | 83.33% | IGHJ4 | IGHD4-17 |
| M_OA_044 | IGHV4-34   | 93.20% | IGHJ3 | -        |
| M_OA_047 | IGHV4-34   | 91.27% | IGHJ4 | IGHD3-22 |
| M_OA_052 | IGHV4-34   | 94.69% | IGHJ6 | IGHD3-9  |
| M_OA_062 | IGHV4-34   | 88.66% | -     | -        |
| M_OA_070 | IGHV4-34   | 98.91% | -     | -        |
| M_OA_086 | IGHV4-34   | 96.45% | IGHJ5 | IGHD6-6  |
| M_OA_088 | IGHV4-34   | 96.67% | IGHJ6 | IGHD3-3  |
| WES_TH1  | IGHV4-34   | 83.82% | IGHJ6 | IGHD5-12 |
| M_LU_004 | IGHV4-38-2 | 91.67% | IGHJ1 | IGHD6-13 |
| WES_TH5  | IGHV4-39   | 88.89% | -     | -        |
| M_OA_025 | IGHV4-39   | 91.11% | -     | -        |
| M_SI_008 | IGHV4-39   | 97.22% | -     | -        |
| M_OA_010 | IGHV4-4    | 89.46% | IGHJ5 | IGHD1-20 |
| M_OA_040 | IGHV4-4    | 87.22% | -     | -        |
| M_OA_091 | IGHV4-4    | 86.11% | -     | -        |
| M_OA_012 | IGHV4-59   | 84.52% | IGHJ3 | IGHD3-3  |
| M_OA_068 | IGHV4-61   | 94.08% | IGHJ4 | IGHD3-10 |
| M_OA_076 | IGHV4-61   | 93.10% | IGHJ3 | IGHD1-26 |
| M_OA_090 | IGHV5-10-1 | 96.50% | IGHJ4 | IGHD3-3  |
| M_OA_095 | IGHV5-10-1 | 95.16% | IGHJ5 | IGHD3-16 |

|          |           |        |       |          |
|----------|-----------|--------|-------|----------|
| M_OA_024 | IGHV6-1   | 94.98% | IGHJ5 | IGHD6-19 |
| WES_SA13 | IGHV7-4-1 | 97.27% | -     | -        |
| M_OA_071 | IGHV7-4-1 | 93.24% | -     | -        |
| M_OA_075 | IGHV7-4-1 | 90.30% | -     | -        |

**Supplementary Table S4:** Performance data of whole exome sequencing.

| Sample          | Total Reads (PE) | Total Bases (Gb) | Unmapped reads(%) | Mapped (Gb) | Mapped Reads (%) | Unique mapped (Gb) | Unique mapped Reads (%) | Coverage >10 reads (%) | Coverage >30 reads (%) |
|-----------------|------------------|------------------|-------------------|-------------|------------------|--------------------|-------------------------|------------------------|------------------------|
| WES_SA1_Tumour  | 47294129         | 7.09             | 9.85              | 6.37        | 89.78            | 5.73               | 90.01                   | 87.93                  | 72.89                  |
| WES_SA2_Tumour  | 62714816         | 9.41             | 9.61              | 8.47        | 90.01            | 7.41               | 87.48                   | 89.44                  | 77.98                  |
| WES_SA3_Tumour  | 79725004         | 11.96            | 10.14             | 10.69       | 89.41            | 9.17               | 85.79                   | 90.41                  | 80.89                  |
| WES_SA4_Tumour  | 67265526         | 10.09            | 10.14             | 9.00        | 89.19            | 7.70               | 85.55                   | 89.08                  | 78.06                  |
| WES_SA5_Tumour  | 70018173         | 10.50            | 10.47             | 9.33        | 88.88            | 8.21               | 87.96                   | 89.06                  | 78.24                  |
| WES_SA6_Tumour  | 65828315         | 9.87             | 9.27              | 8.92        | 90.32            | 7.77               | 87.17                   | 87.89                  | 75.45                  |
| WES_SA7_Tumour  | 20098097         | 3.01             | 3.21              | 2.89        | 95.87            | 2.53               | 87.54                   | 87.59                  | 66.36                  |
| WES_SA8_Tumour  | 29339146         | 4.40             | 2.31              | 4.27        | 97.08            | 3.77               | 88.16                   | 91.88                  | 77.96                  |
| WES_SA9_Tumour  | 27527009         | 4.13             | 3.13              | 3.96        | 95.97            | 3.46               | 87.26                   | 91.32                  | 77.01                  |
| WES_SA10_Tumour | 14736256         | 2.21             | 6.87              | 1.93        | 87.47            | 1.71               | 88.27                   | 74.66                  | 31.62                  |
| WES_SA11_Tumour | 17685306         | 2.65             | 4.30              | 2.46        | 92.78            | 2.18               | 88.42                   | 86.44                  | 58.61                  |
| WES_SA12_Tumour | 32079599         | 4.81             | 2.77              | 4.64        | 96.47            | 4.13               | 89.00                   | 92.81                  | 80.69                  |
| WES_SA13_Tumour | 34163373         | 5.12             | 2.58              | 4.96        | 96.78            | 4.37               | 88.08                   | 93.05                  | 81.4                   |
| WES_TH1_Tumour  | 54496948         | 8.17             | 11.12             | 7.20        | 88.12            | 4.66               | 64.76                   | 85.67                  | 68.88                  |
| WES_TH1_Normal  | 62988730         | 9.45             | 9.92              | 8.46        | 89.57            | 6.89               | 81.36                   | 89.02                  | 77.38                  |
| WES_TH2_Tumour  | 56827985         | 8.52             | 14.91             | 6.63        | 77.81            | 4.19               | 63.11                   | 83.43                  | 63.00                  |
| WES_TH3_Tumour  | 24526288         | 3.68             | 4.07              | 3.50        | 95.18            | 3.07               | 87.63                   | 90.03                  | 73.04                  |
| WES_TH4_Tumour  | 37822356         | 5.67             | 2.91              | 5.47        | 96.42            | 4.94               | 90.22                   | 93.63                  | 82.89                  |
| WES_TH5_Tumour  | 34810481         | 5.22             | 2.87              | 5.04        | 96.48            | 4.49               | 89.09                   | 93.23                  | 81.98                  |
| WES_TH6_Tumour  | 33647078         | 5.05             | 2.92              | 4.87        | 96.43            | 4.37               | 89.77                   | 93.28                  | 81.31                  |

\* Parameters for WES\_SA14 and WES\_TH7 are unavailable due to the closure of the sequencing centre

**Supplementary Table S5:** A shortlist of potential pathogenic variants identified by WES, which were confirmed as somatic changes.

| Sample   | Position    | Ref | Alt | Type                 | Gene     | Exon   | Transcript   | Protein      | cDNA change     | Amino Acids change | AAF  |
|----------|-------------|-----|-----|----------------------|----------|--------|--------------|--------------|-----------------|--------------------|------|
| WES_TH1  | 4:105235860 | -   | A   | frameshift insertion | TET2     | exon3  | NM_001127208 | NP_001120680 | c.1919_1920insA | p.Q640fs           | 0.11 |
| WES_TH7  | 4:105236227 | -   | C   | frameshift insertion | TET2     | exon3  | NM_001127208 | NP_001120680 | c.2286_2287insC | p.H762fs           | 0.19 |
| WES_TH3  | 4:105237285 | C   | -   | frameshift deletion  | TET2     | exon3  | NM_001127208 | NP_001120680 | c.3343delC      | p.P1115fs          | 0.23 |
| WES_SA4  | 4:105243760 | G   | C   | nonsynonymous SNV    | TET2     | exon6  | NM_001127208 | NP_001120680 | c.3785G>C       | p.R1262P           | 0.41 |
| WES_TH7  | 4:105261790 | T   | C   | nonsynonymous SNV    | TET2     | exon8  | NM_001127208 | NP_001120680 | c.3986T>C       | p.L1329P           | 0.18 |
| WES_TH3  | 4:105275764 | A   | -   | frameshift deletion  | TET2     | exon11 | NM_001127208 | NP_001120680 | c.5254delA      | p.K1752fs          | 0.27 |
| WES_SA12 | 3:177038113 | G   | C   | nonsynonymous SNV    | TBL1XR1  | exon12 | NM_024665    | NP_078941    | c.1107C>G       | p.D369E            | 0.33 |
| WES_SA8  | 3:177050011 | A   | G   | nonsynonymous SNV    | TBL1XR1  | exon7  | NM_024665    | NP_078941    | c.688T>C        | p.S230P            | 0.17 |
| WES_SA13 | 3:177051506 | GC  | -   | frameshift deletion  | TBL1XR1  | exon5  | NM_024665    | NP_078941    | c.424_425del    | p.A142fs           | 0.29 |
| WES_SA12 | X:41696085  | A   | C   | nonsynonymous SNV    | GPR34    | exon3  | NM_001097579 | NP_001091048 | c.452A>C        | p.D151A            | 0.44 |
| WES_SA13 | X:41696672  | C   | T   | stopgain             | GPR34    | exon3  | NM_001097579 | NP_001091048 | c.1039C>T       | p.Q347X            | 0.14 |
| WES_SA8  | X:41696693  | G   | T   | stopgain             | GPR34    | exon3  | NM_001097579 | NP_001091048 | c.1060G>T       | p.E354X            | 0.18 |
| WES_TH3  | 1:9723235   | C   | T   | nonsynonymous SNV    | PIK3CD   | exon20 | NM_005026    | NP_005017    | c.2537C>T       | p.A846V            | 0.22 |
| WES_SA5  | 1:9726972   | G   | A   | nonsynonymous SNV    | PIK3CD   | exon24 | NM_005026    | NP_005017    | c.3061G>A       | p.E1021K           | 0.24 |
| WES_TH3  | 6:167137238 | T   | A   | stopgain             | CCR6     | exon3  | NM_004367    | NP_004358    | c.1008T>A       | p.C336X            | 0.24 |
| WES_SA2  | 6:167137261 | C   | G   | stopgain             | CCR6     | exon3  | NM_004367    | NP_004358    | c.1031C>G       | p.S344X            | 0.24 |
| WES_TH7  | 1:2556700   | G   | A   | stopgain             | TNFRSF14 | exon1  | NM_003820    | NP_003811    | c.36G>A         | p.W12X             | 0.25 |
| WES_TH3  | 1:2558376   | -   | G   | frameshift insertion | TNFRSF14 | exon3  | NM_003820    | NP_003811    | c.213_214insG   | p.T71fs            | 0.15 |
| WES_SA3  | 9:136496197 | AG  | -   | frameshift deletion  | NOTCH1   | exon34 | NM_017617    | NP_060087    | c.7541_7542del  | p.P2514fs          | 0.53 |
| WES_TH1  | 8:42306376  | A   | G   | nonsynonymous SNV    | IKBKB    | exon7  | NM_001556    | NP_001547    | c.511A>G        | p.K171E            | 0.26 |
| WES_SA12 | 4:1801838   | G   | A   | nonsynonymous SNV    | FGFR3    | exon7  | NM_000142    | NP_000133    | c.743G>A        | p.R248H            | 0.18 |
| WES_TH7  | 13:40560724 | G   | A   | nonsynonymous SNV    | FOXO1    | exon2  | NM_002015    | NP_002006    | c.767C>T        | p.S256F            | 0.21 |

**Supplementary Table S6:** Variants detected in novel genes by Fluidigm Access Array and Illumina MiSeq sequencing

| Sample   | Position    | Type                 | Gene   | Exon   | Transcript   | Protein      | cDNA change     | Amino acid change | AAF  | Somatic Status      | PolyPhen2                | COSMIC      |
|----------|-------------|----------------------|--------|--------|--------------|--------------|-----------------|-------------------|------|---------------------|--------------------------|-------------|
| M_OA_061 | 6:167136707 | nonsynonymous SNV    | CCR6   | exon3  | NM_004367    | NP_004358    | c.477A>C        | p.R159S           | 0.44 | Unknown             | 0.11 / benign            | -           |
| M_SA_045 | 6:167137235 | stopgain             | CCR6   | exon3  | NM_004367    | NP_004358    | c.1005G>A       | p.W335X           | 0.16 | Previously Reported | -                        | COSM3860401 |
| WES_TH3  | 6:167137238 | stopgain             | CCR6   | exon3  | NM_004367    | NP_004358    | c.1008T>A       | p.C336X           | 0.24 | Somatic             | -                        | -           |
| M_SA_059 | 6:167137252 | frameshift insertion | CCR6   | exon3  | NM_004367    | NP_004358    | c.1023_1024insC | p.Y341fs          | 0.11 | Somatic             | -                        | -           |
| WES_SA2  | 6:167137261 | stopgain             | CCR6   | exon3  | NM_004367    | NP_004358    | c.1031C>G       | p.S344X           | 0.24 | Somatic             | -                        | -           |
| M_GA_044 | 6:167137285 | nonsynonymous SNV    | CCR6   | exon3  | NM_004367    | NP_004358    | c.1055A>G       | p.Y352C           | 0.30 | Unknown             | 0.81 / possibly damaging | -           |
| M_GA_018 | 6:167137299 | frameshift deletion  | CCR6   | exon3  | NM_004367    | NP_004358    | c.1069_1070del  | p.S357fs          | 0.32 | Somatic             | -                        | -           |
| WES_SA12 | 4:1801838   | nonsynonymous SNV    | FGFR3  | exon7  | NM_000142    | NP_000133    | c.743G>A        | p.R248H           | 0.18 | Somatic             | 1 / probably damaging    | COSM1757310 |
| M_OA_082 | 4:1801863   | nonsynonymous SNV    | FGFR3  | exon7  | NM_000142    | NP_000133    | c.768G>T        | p.Q256H           | 0.48 | Unknown             | 0.99 / probably damaging | -           |
| M_SA_030 | 4:1804395   | nonsynonymous SNV    | FGFR3  | exon9  | NM_000142    | NP_000133    | c.1141G>A       | p.V381M           | 0.11 | Unknown             | 0.89 / possibly damaging | -           |
| M_SA_015 | 4:1804435   | nonsynonymous SNV    | FGFR3  | exon9  | NM_000142    | NP_000133    | c.1181C>T       | p.T394M           | 0.30 | Somatic             | 0.22 / benign            | -           |
| M_GA_018 | 13:40560529 | nonsynonymous SNV    | FOXO1  | exon2  | NM_002015    | NP_002006    | c.962C>T        | p.A321V           | 0.19 | Somatic             | 1 / probably damaging    | -           |
| WES_TH7  | 13:40560724 | nonsynonymous SNV    | FOXO1  | exon2  | NM_002015    | NP_002006    | c.767C>T        | p.S256F           | 0.21 | Somatic             | 1 / probably damaging    | -           |
| M_OA_003 | X:41695884  | nonsynonymous SNV    | GPR34  | exon3  | NM_001097579 | NP_001091048 | c.251G>A        | p.R84H            | 0.18 | Previously Reported | 0.94 / possibly damaging | COSM275353  |
| WES_SA12 | X:41696085  | nonsynonymous SNV    | GPR34  | exon3  | NM_001097579 | NP_001091048 | c.452A>C        | p.D151A           | 0.44 | Somatic             | 1 / probably damaging    | -           |
| M_SA_063 | X:41696612  | nonsynonymous SNV    | GPR34  | exon3  | NM_001097579 | NP_001091048 | c.979T>A        | p.Y327N           | 0.43 | Somatic             | 1 / probably damaging    | -           |
| M_SA_054 | X:41696651  | stopgain             | GPR34  | exon3  | NM_001097579 | NP_001091048 | c.1018C>T       | p.Q340X           | 0.27 | Unknown             | -                        | -           |
| M_SA_008 | X:41696666  | stopgain             | GPR34  | exon3  | NM_001097579 | NP_001091048 | c.1033C>T       | p.R345X           | 0.18 | Somatic             | -                        | -           |
| M_SA_013 | X:41696672  | stopgain             | GPR34  | exon3  | NM_001097579 | NP_001091048 | c.1039C>T       | p.Q347X           | 0.21 | Previously Reported | -                        | -           |
| M_SA_060 | X:41696672  | stopgain             | GPR34  | exon3  | NM_001097579 | NP_001091048 | c.1039C>T       | p.Q347X           | 0.14 | Previously Reported | -                        | -           |
| WES_SA13 | X:41696672  | stopgain             | GPR34  | exon3  | NM_001097579 | NP_001091048 | c.1039C>T       | p.Q347X           | 0.14 | Somatic             | -                        | -           |
| M_SA_021 | X:41696681  | frameshift insertion | GPR34  | exon3  | NM_001097579 | NP_001091048 | c.1047_1048dupC | p.E349fs          | 0.07 | Unknown             | -                        | -           |
| WES_SA8  | X:41696693  | stopgain             | GPR34  | exon3  | NM_001097579 | NP_001091048 | c.1060G>T       | p.E354X           | 0.18 | Somatic             | -                        | -           |
| WES_TH1  | 8:42306376  | nonsynonymous SNV    | IKBKB  | exon7  | NM_001556    | NP_001547    | c.511A>G        | p.K171E           | 0.26 | Somatic             | 1 / probably damaging    | COSM4944023 |
| M_GA_040 | 9:136496197 | frameshift deletion  | NOTCH1 | exon34 | NM_017617    | NP_060087    | c.7541_7542del  | p.P2514fs         | 0.31 | Previously Reported | -                        | COSM12774   |
| M_GA_045 | 9:136496197 | frameshift deletion  | NOTCH1 | exon34 | NM_017617    | NP_060087    | c.7541_7542del  | p.P2514fs         | 0.42 | Previously Reported | -                        | COSM12774   |
| WES_SA11 | 9:136496197 | frameshift deletion  | NOTCH1 | exon34 | NM_017617    | NP_060087    | c.7541_7542del  | p.P2514fs         | 0.29 | Somatic             | -                        | COSM12774   |
| WES_SA3  | 9:136496197 | frameshift deletion  | NOTCH1 | exon34 | NM_017617    | NP_060087    | c.7541_7542del  | p.P2514fs         | 0.53 | Somatic             | -                        | COSM12774   |
| M_OA_007 | 9:136496489 | nonsynonymous SNV    | NOTCH1 | exon34 | NM_017617    | NP_060087    | c.7250C>G       | p.P2417R          | 0.34 | Unknown             | 0.67 / possibly damaging | -           |
| M_GA_034 | 9:136496908 | frameshift deletion  | NOTCH1 | exon34 | NM_017617    | NP_060087    | c.6831delT      | p.P2277fs         | 0.16 | Unknown             | -                        | -           |
| M_GA_018 | 9:136497204 | nonsynonymous SNV    | NOTCH1 | exon34 | NM_017617    | NP_060087    | c.6535C>T       | p.R2179W          | 0.13 | Somatic             | 0.99 / probably damaging | -           |
| M_SA_064 | 9:136497282 | nonsynonymous SNV    | NOTCH1 | exon34 | NM_017617    | NP_060087    | c.6457G>A       | p.V2153M          | 0.12 | Somatic             | 0.01 / benign            | -           |

|          |             |                        |         |        |           |           |                |              |      |                     |                          |             |
|----------|-------------|------------------------|---------|--------|-----------|-----------|----------------|--------------|------|---------------------|--------------------------|-------------|
| M_OA_110 | 9:136497388 | nonsynonymous SNV      | NOTCH1  | exon34 | NM_017617 | NP_060087 | c.6351C>A      | p.N2117K     | 0.27 | Unknown             | 0.65 / possibly damaging | -           |
| M_SA_037 | 1:9716542   | stopgain               | PIK3CD  | exon6  | NM_005026 | NP_005017 | c.703C>T       | p.Q235X      | 0.14 | Unknown             | -                        | -           |
| M_SA_060 | 1:9716984   | nonsynonymous SNV      | PIK3CD  | exon7  | NM_005026 | NP_005017 | c.806G>A       | p.G269E      | 0.20 | Unknown             | 0.99 / probably damaging | -           |
| M_TH_001 | 1:9717608   | nonsynonymous SNV      | PIK3CD  | exon8  | NM_005026 | NP_005017 | c.1002C>G      | p.N334K      | 0.26 | Unknown             | 1 / probably damaging    | -           |
| M_OA_048 | 1:9717612   | nonsynonymous SNV      | PIK3CD  | exon8  | NM_005026 | NP_005017 | c.1006G>A      | p.D336N      | 0.38 | Unknown             | 0.98 / probably damaging | -           |
| M_OA_010 | 1:9720174   | nonsynonymous SNV      | PIK3CD  | exon11 | NM_005026 | NP_005017 | c.1402G>A      | p.A468T      | 0.50 | Unknown             | 0.97 / probably damaging | -           |
| M_OA_061 | 1:9720228   | nonsynonymous SNV      | PIK3CD  | exon11 | NM_005026 | NP_005017 | c.1456C>T      | p.P486S      | 0.11 | Unknown             | 1 / probably damaging    | -           |
| WES_TH3  | 1:9723235   | nonsynonymous SNV      | PIK3CD  | exon20 | NM_005026 | NP_005017 | c.2537C>T      | p.A846V      | 0.22 | Somatic             | 0.99 / probably damaging | -           |
| M_SA_031 | 1:9724349   | nonsynonymous SNV      | PIK3CD  | exon22 | NM_005026 | NP_005017 | c.2792C>T      | p.P931L      | 0.16 | Somatic             | 1 / probably damaging    | -           |
| M_SA_030 | 1:9726972   | nonsynonymous SNV      | PIK3CD  | exon24 | NM_005026 | NP_005017 | c.3061G>A      | p.E1021K     | 0.14 | Previously Reported | 1 / probably damaging    | COSM1581454 |
| WES_SA5  | 1:9726972   | nonsynonymous SNV      | PIK3CD  | exon24 | NM_005026 | NP_005017 | c.3061G>A      | p.E1021K     | 0.24 | Somatic             | 1 / probably damaging    | COSM1581454 |
| WES_TH2  | 1:9727042   | nonsynonymous SNV      | PIK3CD  | exon24 | NM_005026 | NP_005017 | c.3131A>G      | p.Q1044R     | 0.24 | Unknown             | 0.99 / probably damaging | -           |
| M_OA_071 | 3:177032999 | nonsynonymous SNV      | TBL1XR1 | exon14 | NM_024665 | NP_078941 | c.1388A>T      | p.D463V      | 0.45 | Previously Reported | 0.96 / probably damaging | COSM5708568 |
| M_SA_062 | 3:177033050 | nonsynonymous SNV      | TBL1XR1 | exon14 | NM_024665 | NP_078941 | c.1337A>G      | p.Y446C      | 0.28 | Somatic             | 0.94 / possibly damaging | COSM5045122 |
| M_OA_025 | 3:177033050 | nonsynonymous SNV      | TBL1XR1 | exon14 | NM_024665 | NP_078941 | c.1337A>G      | p.Y446C      | 0.30 | Previously Reported | 0.94 / possibly damaging | COSM5045122 |
| M_SA_030 | 3:177033050 | nonsynonymous SNV      | TBL1XR1 | exon14 | NM_024665 | NP_078941 | c.1337A>G      | p.Y446C      | 0.27 | Previously Reported | 0.94 / possibly damaging | COSM5045122 |
| M_LU_027 | 3:177033051 | nonsynonymous SNV      | TBL1XR1 | exon14 | NM_024665 | NP_078941 | c.1336T>G      | p.Y446D      | 0.44 | Previously Reported | 0.99 / probably damaging | COSM5045122 |
| M_SA_012 | 3:177033121 | nonframeshift deletion | TBL1XR1 | exon14 | NM_024665 | NP_078941 | c.1264_1266del | p.422_422del | 0.17 | Somatic             | -                        | -           |
| M_OA_046 | 3:177034271 | nonsynonymous SNV      | TBL1XR1 | exon13 | NM_024665 | NP_078941 | c.1177G>A      | p.E393K      | 0.67 | Unknown             | 0.99 / probably damaging | -           |
| M_LU_027 | 3:177038113 | nonsynonymous SNV      | TBL1XR1 | exon12 | NM_024665 | NP_078941 | c.1107C>G      | p.D369E      | 0.41 | Previously Reported | 0.99 / probably damaging | -           |
| WES_SA12 | 3:177038113 | nonsynonymous SNV      | TBL1XR1 | exon12 | NM_024665 | NP_078941 | c.1107C>G      | p.D369E      | 0.33 | Somatic             | 0.99 / probably damaging | -           |
| M_SA_008 | 3:177038113 | nonsynonymous SNV      | TBL1XR1 | exon12 | NM_024665 | NP_078941 | c.1107C>G      | p.D369E      | 0.10 | Previously Reported | 0.99 / probably damaging | -           |
| M_SA_063 | 3:177038169 | nonsynonymous SNV      | TBL1XR1 | exon12 | NM_024665 | NP_078941 | c.1051G>A      | p.E351K      | 0.27 | Somatic             | 1 / probably damaging    | -           |
| M_GA_044 | 3:177038316 | nonsynonymous SNV      | TBL1XR1 | exon11 | NM_024665 | NP_078941 | c.1044T>A      | p.H348Q      | 0.17 | Unknown             | 1 / probably damaging    | -           |
| M_SA_045 | 3:177038381 | nonframeshift deletion | TBL1XR1 | exon11 | NM_024665 | NP_078941 | c.977_979del   | p.326_327del | 0.15 | Unknown             | -                        | -           |
| WES_SA5  | 3:177038381 | nonframeshift deletion | TBL1XR1 | exon11 | NM_024665 | NP_078941 | c.977_979del   | p.326_327del | 0.25 | Unknown             | -                        | -           |
| M_SA_054 | 3:177038425 | nonsynonymous SNV      | TBL1XR1 | exon11 | NM_024665 | NP_078941 | c.935T>C       | p.L312S      | 0.27 | Unknown             | 0.99 / probably damaging | -           |
| M_GA_040 | 3:177038435 | splice site            | TBL1XR1 | exon11 | NM_024665 | NP_078941 | c.926-1G>T     | .            | 0.24 | Previously Reported | -                        | -           |
| M_SA_065 | 3:177038435 | splice site            | TBL1XR1 | exon11 | NM_024665 | NP_078941 | c.926-1G>T     | .            | 0.20 | Somatic             | -                        | -           |
| M_GA_017 | 3:177038435 | splice site            | TBL1XR1 | exon11 | NM_024665 | NP_078941 | c.926-1G>C     | .            | 0.29 | Somatic             | -                        | COSM5650935 |
| M_OA_043 | 3:177046134 | nonsynonymous SNV      | TBL1XR1 | exon10 | NM_024665 | NP_078941 | c.920A>G       | p.H307R      | 0.21 | Previously Reported | 0.99 / probably damaging | COSM5708585 |
| M_CU_008 | 3:177046138 | nonsynonymous SNV      | TBL1XR1 | exon10 | NM_024665 | NP_078941 | c.916T>G       | p.F306L      | 0.12 | Unknown             | 0.71 / possibly damaging | -           |
| M_SA_033 | 3:177047501 | nonframeshift deletion | TBL1XR1 | exon8  | NM_024665 | NP_078941 | c.749_751del   | p.250_251del | 0.12 | Somatic             | -                        | -           |
| M_SA_063 | 3:177047513 | nonsynonymous SNV      | TBL1XR1 | exon8  | NM_024665 | NP_078941 | c.739G>A       | p.G247R      | 0.21 | Previously Reported | 1 / probably damaging    | COSM1235152 |
| WES_SA8  | 3:177050011 | nonsynonymous SNV      | TBL1XR1 | exon7  | NM_024665 | NP_078941 | c.688T>C       | p.S230P      | 0.17 | Somatic             | 1 / probably damaging    | -           |
| WES_SA13 | 3:177050115 | nonsynonymous SNV      | TBL1XR1 | exon7  | NM_024665 | NP_078941 | c.584T>A       | p.I195K      | 0.17 | Unknown             | 1 / probably damaging    | -           |

|          |             |                        |         |        |              |              |                  |                |      |                     |                          |             |
|----------|-------------|------------------------|---------|--------|--------------|--------------|------------------|----------------|------|---------------------|--------------------------|-------------|
| M_SA_007 | 3:177050136 | nonsynonymous SNV      | TBL1XR1 | exon7  | NM_024665    | NP_078941    | c.563C>T         | p.S188F        | 0.21 | Somatic             | 1 / probably damaging    | COSM5414958 |
| M_TO_001 | 3:177050479 | nonsynonymous SNV      | TBL1XR1 | exon6  | NM_024665    | NP_078941    | c.559G>T         | p.G187W        | 0.18 | Somatic             | 1 / probably damaging    | -           |
| M_OA_048 | 3:177050487 | nonframeshift deletion | TBL1XR1 | exon6  | NM_024665    | NP_078941    | c.549_551del     | p.183_184del   | 0.40 | Unknown             | -                        | -           |
| M_OA_061 | 3:177050513 | nonsynonymous SNV      | TBL1XR1 | exon6  | NM_024665    | NP_078941    | c.525T>G         | p.C175W        | 0.17 | Unknown             | 1 / probably damaging    | -           |
| WES_SA13 | 3:177051506 | frameshift deletion    | TBL1XR1 | exon5  | NM_024665    | NP_078941    | c.424_425del     | p.A142fs       | 0.29 | Somatic             | -                        | -           |
| M_OA_077 | 3:177051507 | stopgain               | TBL1XR1 | exon5  | NM_024665    | NP_078941    | c.423_424insTA   | A142_N143delir | 0.57 | Unknown             | -                        | -           |
| M_TH_009 | 4:105234759 | stopgain               | TET2    | exon3  | NM_001127208 | NP_001120680 | c.817C>T         | p.Q273X        | 0.26 | Somatic             | -                        | COSM214588  |
| M_OA_065 | 4:105234771 | nonsynonymous SNV      | TET2    | exon3  | NM_001127208 | NP_001120680 | c.829G>A         | p.A277T        | 0.51 | Previously Reported | 0.47/ possibly damaging  | COSM200502  |
| M_SA_036 | 4:105235171 | nonsynonymous SNV      | TET2    | exon3  | NM_001127208 | NP_001120680 | c.1229C>T        | p.P410L        | 0.18 | Somatic             | 0.1 / benign             | -           |
| M_GA_003 | 4:105235551 | stopgain               | TET2    | exon3  | NM_001127208 | NP_001120680 | c.1609G>T        | p.E537X        | 0.64 | Somatic             | -                        | -           |
| M_OA_014 | 4:105235570 | nonsynonymous SNV      | TET2    | exon3  | NM_001127208 | NP_001120680 | c.1628G>T        | p.G543D        | 0.51 | Unknown             | 0 / benign               | -           |
| M_CU_001 | 4:105235684 | nonsynonymous SNV      | TET2    | exon3  | NM_001127208 | NP_001120680 | c.1742G>A        | p.R581H        | 0.13 | Unknown             | 0 / benign               | -           |
| WES_TH1  | 4:105235860 | frameshift insertion   | TET2    | exon3  | NM_001127208 | NP_001120680 | c.1919insA       | p.Q640fs       | 0.11 | Somatic             | -                        | -           |
| WES_TH7  | 4:105236227 | frameshift insertion   | TET2    | exon3  | NM_001127208 | NP_001120680 | c.2286insC       | p.H762fs       | 0.19 | Somatic             | -                        | -           |
| M_GA_001 | 4:105236455 | frameshift insertion   | TET2    | exon3  | NM_001127208 | NP_001120680 | c.2513_2514ins16 | p.T838fs       | 0.24 | Unknown             | -                        | -           |
| WES_SA10 | 4:105236703 | nonsynonymous SNV      | TET2    | exon3  | NM_001127208 | NP_001120680 | c.2761A>G        | p.I921V        | 0.35 | Unknown             | 0 / benign               | -           |
| M_OA_060 | 4:105237229 | nonsynonymous SNV      | TET2    | exon3  | NM_001127208 | NP_001120680 | c.3287C>G        | p.T1096R       | 0.26 | Unknown             | 0.99 / probably damaging | -           |
| M_GA_037 | 4:105237254 | frameshift deletion    | TET2    | exon3  | NM_001127208 | NP_001120680 | c.3312_3313del   | p.F1104fs      | 0.13 | Unknown             | -                        | -           |
| WES_TH3  | 4:105237285 | frameshift deletion    | TET2    | exon3  | NM_001127208 | NP_001120680 | c.3343delC       | p.P1115fs      | 0.23 | Somatic             | -                        | COSM1318622 |
| M_TH_007 | 4:105237295 | frameshift deletion    | TET2    | exon3  | NM_001127208 | NP_001120680 | c.3353_3356del   | p.N1118fs      | 0.58 | Unknown             | -                        | -           |
| M_GA_001 | 4:105243756 | nonsynonymous SNV      | TET2    | exon6  | NM_001127208 | NP_001120680 | c.3781C>A        | p.R1261S       | 0.28 | Previously Reported | 1 / probably damaging    | COSM4170060 |
| M_SA_060 | 4:105243759 | nonsynonymous SNV      | TET2    | exon6  | NM_001127208 | NP_001120680 | c.3784C>T        | p.R1262W       | 0.35 | Previously Reported | 1 / probably damaging    | COSM5564331 |
| WES_SA4  | 4:105243760 | nonsynonymous SNV      | TET2    | exon6  | NM_001127208 | NP_001120680 | c.3785G>C        | p.R1262P       | 0.41 | Somatic             | 1 / probably damaging    | COSM5879022 |
| M_SA_051 | 4:105243774 | nonsynonymous SNV      | TET2    | exon6  | NM_001127208 | NP_001120680 | c.3799G>A        | p.E1267K       | 0.28 | Somatic             | 1 / probably damaging    | -           |
| M_TH_009 | 4:105259622 | frameshift deletion    | TET2    | exon7  | NM_001127208 | NP_001120680 | c.3807delA       | p.R1269fs      | 0.19 | Somatic             | -                        | -           |
| WES_TH5  | 4:105259626 | frameshift insertion   | TET2    | exon7  | NM_001127208 | NP_001120680 | c.3812dupG       | p.C1271fs      | 0.13 | Unknown             | -                        | -           |
| M_TH_007 | 4:105259635 | stopgain               | TET2    | exon7  | NM_001127208 | NP_001120680 | c.3820C>T        | p.Q1274X       | 0.39 | Previously Reported | -                        | COSM96488   |
| WES_TH7  | 4:105261790 | nonsynonymous SNV      | TET2    | exon8  | NM_001127208 | NP_001120680 | c.3986T>C        | p.L1329P       | 0.18 | Somatic             | 1 / probably damaging    | COSM4170038 |
| M_OA_115 | 4:105269641 | nonsynonymous SNV      | TET2    | exon9  | NM_001127208 | NP_001120680 | c.4076G>C        | p.R1359P       | 0.25 | Unknown             | 1 / probably damaging    | -           |
| M_LU_015 | 4:105269674 | nonsynonymous SNV      | TET2    | exon9  | NM_001127208 | NP_001120680 | c.4109G>A        | p.G1370E       | 0.15 | Unknown             | 1 / probably damaging    | COSM41852   |
| M_TH_001 | 4:105269748 | splice site            | TET2    | exon9  | NM_001127208 | NP_001120680 | c.4182+1G>A      | .              | 0.19 | Unknown             | -                        | -           |
| M_TH_001 | 4:105272905 | frameshift deletion    | TET2    | exon10 | NM_001127208 | NP_001120680 | c.4524_4537del   | p.A1508fs      | 0.12 | Unknown             | -                        | -           |
| M_TH_002 | 4:105275569 | stopgain               | TET2    | exon11 | NM_001127208 | NP_001120680 | c.5059C>T        | p.Q1687X       | 0.19 | Somatic             | -                        | COSM43421   |
| WES_TH3  | 4:105275764 | frameshift deletion    | TET2    | exon11 | NM_001127208 | NP_001120680 | c.5254delA       | p.K1752fs      | 0.27 | Somatic             | -                        | -           |
| WES_TH1  | 4:105276065 | frameshift deletion    | TET2    | exon11 | NM_001127208 | NP_001120680 | c.5555delA       | p.Q1852fs      | 0.32 | Unknown             | -                        | -           |
| M_TH_002 | 4:105276128 | nonsynonymous SNV      | TET2    | exon11 | NM_001127208 | NP_001120680 | c.5618T>C        | p.I1873T       | 0.19 | Somatic             | 1 / probably damaging    | COSM41741   |

|          |             |                        |          |        |              |              |              |            |      |                     |                          |             |
|----------|-------------|------------------------|----------|--------|--------------|--------------|--------------|------------|------|---------------------|--------------------------|-------------|
| M_OA_080 | 4:105276404 | nonsynonymous SNV      | TET2     | exon11 | NM_001127208 | NP_001120680 | c.5894T>C    | p.L1965P   | 0.47 | Unknown             | 0.99 / probably damaging | -           |
| WES_TH3  | 1:2556666   | nonsynonymous SNV      | TNFRSF14 | exon1  | NM_003820    | NP_003811    | c.2T>C       | p.M1T      | 0.20 | Unknown             | 0.97 / probably damaging | -           |
| WES_TH7  | 1:2556667   | nonsynonymous SNV      | TNFRSF14 | exon1  | NM_003820    | NP_003811    | c.3G>A       | p.M1I      | 0.27 | Previously Reported | 0.92 / possibly damaging | COSM5947672 |
| WES_TH7  | 1:2556700   | stopgain               | TNFRSF14 | exon1  | NM_003820    | NP_003811    | c.36G>A      | p.W12X     | 0.25 | Somatic             | -                        | COSM5950233 |
| M_TH_001 | 1:2556701   | stopgain               | TNFRSF14 | exon1  | NM_003820    | NP_003811    | c.37A>T      | p.R13X     | 0.41 | Unknown             | -                        | -           |
| M_OA_076 | 1:2557774   | nonsynonymous SNV      | TNFRSF14 | exon2  | NM_003820    | NP_003811    | c.118C>T     | p.P40S     | 0.53 | Unknown             | 0.98 / probably damaging | -           |
| M_OA_033 | 1:2557797   | stopgain               | TNFRSF14 | exon2  | NM_003820    | NP_003811    | c.141C>G     | p.Y47X     | 0.47 | Unknown             | -                        | -           |
| M_OA_033 | 1:2558347   | stopgain               | TNFRSF14 | exon3  | NM_003820    | NP_003811    | c.183T>A     | p.Y61X     | 0.41 | Unknown             | -                        | -           |
| M_LU_027 | 1:2558359   | nonframeshift deletion | TNFRSF14 | exon3  | NM_003820    | NP_003811    | c.195_212del | p.65_71del | 0.61 | Unknown             | -                        | -           |
| WES_TH3  | 1:2558376   | frameshift insertion   | TNFRSF14 | exon3  | NM_003820    | NP_003811    | c.213insG    | p.T71fs    | 0.15 | Somatic             | -                        | -           |
| M_GA_017 | 1:2558381   | nonsynonymous SNV      | TNFRSF14 | exon3  | NM_003820    | NP_003811    | c.217A>G     | p.T73A     | 0.39 | Somatic             | 0.99 / probably damaging | -           |
| M_GA_018 | 1:2558382   | nonsynonymous SNV      | TNFRSF14 | exon3  | NM_003820    | NP_003811    | c.218C>T     | p.T73I     | 0.12 | Somatic             | 0.99 / probably damaging | -           |
| M_TH_009 | 1:2559832   | nonsynonymous SNV      | TNFRSF14 | exon4  | NM_003820    | NP_003811    | c.314T>C     | p.L105P    | 0.51 | Unknown             | 1 / probably damaging    | -           |
| M_GA_037 | 1:2559921   | nonsynonymous SNV      | TNFRSF14 | exon4  | NM_003820    | NP_003811    | c.403T>C     | p.C135R    | 0.25 | Unknown             | 1 / probably damaging    | -           |
| M_OA_068 | 1:2559921   | nonsynonymous SNV      | TNFRSF14 | exon4  | NM_003820    | NP_003811    | c.403T>C     | p.C135R    | 0.15 | Unknown             | 1 / probably damaging    | -           |
| M_OA_052 | 1:2560629   | nonsynonymous SNV      | TNFRSF14 | exon5  | NM_003820    | NP_003811    | c.466G>A     | p.E156K    | 0.52 | Unknown             | 0.99 / probably damaging | -           |
| M_OA_089 | 1:2560657   | frameshift insertion   | TNFRSF14 | exon5  | NM_003820    | NP_003811    | c.495insC    | p.C165fs   | 0.46 | Unknown             | -                        | -           |
| M_SA_050 | 1:2560681   | nonsynonymous SNV      | TNFRSF14 | exon5  | NM_003820    | NP_003811    | c.518A>G     | p.N173S    | 0.12 | Somatic             | 0.14 / benign            | -           |
| M_OA_049 | 1:2560707   | stopgain               | TNFRSF14 | exon5  | NM_003820    | NP_003811    | c.544C>T     | p.Q182X    | 0.73 | Unknown             | -                        | -           |
| M_TH_002 | 1:2560713   | stopgain               | TNFRSF14 | exon5  | NM_003820    | NP_003811    | c.550A>T     | p.K184X    | 0.40 | Somatic             | -                        | -           |
| M_TH_008 | 1:2561672   | splice site            | TNFRSF14 | exon6  | NM_003820    | NP_003811    | c.552-1G>A   | .          | 0.30 | Unknown             | -                        | -           |
| M_SA_058 | 1:2563149   | nonsynonymous SNV      | TNFRSF14 | exon8  | NM_003820    | NP_003811    | c.728G>A     | p.R243Q    | 0.53 | Germline            | 0.64 / possibly damaging | COSM28384   |



**Supplementary Table S7:** Variants detected in genes previously screened by Fluidigm Access Array and Illumina MiSeq sequencing

| Sample   | Position    | Type                   | Gene    | Exon   | Transcript   | Protein      | cDNA change      | Amino acid change | AAF  | Somatic Status      | PolyPhen2                | COSMIC      |
|----------|-------------|------------------------|---------|--------|--------------|--------------|------------------|-------------------|------|---------------------|--------------------------|-------------|
| M_SA_056 | 15:44711548 | nonsynonymous SNV      | B2M     | exon1  | NM_004048    | NP_004039    | c.2T>C           | p.M1T             | 0.16 | Previously reported | 0.39 / benign            | COSM144529  |
| M_SA_054 | 7:2939888   | nonframeshift deletion | CARD11  | exon6  | NM_032415    | NP_115791    | c.723_725del     | p.241_242del      | 0.22 | Unknown             | -                        | -           |
| M_GA_037 | 7:2944251   | nonsynonymous SNV      | CARD11  | exon5  | NM_032415    | NP_115791    | c.645G>T         | p.K215N           | 0.14 | Previously reported | 0.99 / probably damaging | COSM85974   |
| M_SA_057 | 7:2944447   | nonframeshift deletion | CARD11  | exon5  | NM_032415    | NP_115791    | c.426_449del     | p.142_150del      | 0.44 | Unknown             | -                        | -           |
| M_SA_062 | 1:116536117 | stopgain               | CD58    | exon3  | NM_001779    | NP_001770    | c.476G>A         | p.W159X           | 0.13 | Previously reported | -                        | COSM894401  |
| M_GA_031 | 19:41879011 | nonsynonymous SNV      | CD79A   | exon2  | NM_001783    | NP_001774    | c.101G>C         | p.W34S            | 0.27 | Unknown             | 0.68 / possibly damaging | -           |
| M_GA_031 | 19:41879187 | nonsynonymous SNV      | CD79A   | exon2  | NM_001783    | NP_001774    | c.277A>G         | p.I93V            | 0.24 | Unknown             | 0.71 / possibly damaging | -           |
| M_SA_055 | 16:3731371  | nonsynonymous SNV      | CREBBP  | exon30 | NM_004380    | NP_004371    | c.4993G>A        | p.D1665N          | 0.12 | Previously reported | 1 / probably damaging    | COSM6005471 |
| M_LU_037 | 16:3731804  | nonsynonymous SNV      | CREBBP  | exon29 | NM_004380    | NP_004371    | c.4862T>C        | p.L1621P          | 0.19 | Unknown             | 0.99 / probably damaging | -           |
| M_GA_035 | 16:3738605  | nonsynonymous SNV      | CREBBP  | exon26 | NM_004380    | NP_004371    | c.4348T>A        | p.Y1450N          | 0.25 | Unknown             | 1 / probably damaging    | -           |
| M_SA_057 | 16:3744933  | nonsynonymous SNV      | CREBBP  | exon23 | NM_004380    | NP_004371    | c.3943A>C        | p.T1315P          | 0.13 | Unknown             | 0.97 / probably damaging | -           |
| M_SA_060 | 22:41173740 | nonsynonymous SNV      | EP300   | exon29 | NM_001429    | NP_001420    | c.4735G>A        | p.D1579N          | 0.17 | Unknown             | 1 / probably damaging    | -           |
| M_GA_042 | 22:41176505 | nonsynonymous SNV      | EP300   | exon30 | NM_001429    | NP_001420    | c.5038C>T        | p.R1680C          | 0.15 | Previously reported | 1 / probably damaging    | COSM96420   |
| M_SA_055 | 12:49026794 | nonsynonymous SNV      | KMT2D   | exon48 | NM_003482    | NP_003473    | c.15172G>A       | p.V5058M          | 0.16 | Previously reported | 1 / probably damaging    | COSM4702413 |
| M_SA_060 | 12:49034667 | splice site            | KMT2D   | exon36 | NM_003482    | NP_003473    | c.10356-1G>A     | .                 | 0.12 | Unknown             | -                        | -           |
| M_SA_060 | 12:49046113 | nonsynonymous SNV      | KMT2D   | exon17 | NM_003482    | NP_003473    | c.4645G>A        | p.E1549K          | 0.19 | Unknown             | 0.98 / probably damaging | -           |
| M_SA_062 | 19:19149297 | nonsynonymous SNV      | MEF2B   | exon3  | NM_001145785 | NP_001139257 | c.187G>A         | p.D63N            | 0.23 | Unknown             | 1 / probably damaging    | -           |
| M_OA_103 | 3:38140801  | nonsynonymous SNV      | MYD88   | exon4  | NM_002468    | NP_002459.2  | c.728G>A         | p.S243N           | 0.48 | Previously reported | 1 / probably damaging    | COSM85943   |
| M_OA_110 | 3:38141150  | nonsynonymous SNV      | MYD88   | exon5  | NM_002468    | NP_002459.2  | c.794T>C         | p.L265P           | 0.37 | Previously reported | 1 / probably damaging    | COSM85940   |
| M_SA_052 | 3:38141150  | stoploss               | MYD88   | exon5  | NM_002468    | NP_002459.2  | c.794T>C         | p.L265P           | 0.34 | Previously reported | 1 / probably damaging    | COSM85940   |
| M_GA_033 | 6:106104827 | stopgain               | PRDM1   | exon5  | NM_001198    | NP_001189    | c.667C>T         | p.Q223X           | 0.36 | Unknown             | -                        | -           |
| M_GA_028 | 6:106105266 | nonsynonymous SNV      | PRDM1   | exon5  | NM_001198    | NP_001189    | c.1106A>G        | p.E369G           | 0.13 | Unknown             | 0.52 / possibly damaging | -           |
| M_SA_061 | 6:137871402 | stopgain               | TNFAIP3 | exon2  | NM_006290    | NP_006281    | c.175C>T         | p.Q59X            | 0.25 | Unknown             | -                        | -           |
| M_OA_110 | 6:137871453 | nonsynonymous SNV      | TNFAIP3 | exon2  | NM_006290    | NP_006281    | c.226A>T         | p.T76S            | 0.51 | Unknown             | 0 / benign               | -           |
| M_OA_107 | 6:137871495 | frameshift deletion    | TNFAIP3 | exon2  | NM_006290    | NP_006281    | c.268_269del     | p.R90fs           | 0.53 | Unknown             | -                        | -           |
| M_LU_037 | 6:137871521 | frameshift insertion   | TNFAIP3 | exon2  | NM_006290    | NP_006281    | c.294_295insTTAG | p.N98fs           | 0.59 | Unknown             | -                        | -           |
| M_OA_105 | 6:137874824 | nonframeshift deletion | TNFAIP3 | exon3  | NM_006290    | NP_006281    | c.296_316del     | p.99_106del       | 0.30 | Unknown             | -                        | -           |
| M_GA_001 | 6:137874997 | stopgain               | TNFAIP3 | exon3  | NM_006290    | NP_006281    | c.448C>T         | p.Q150X           | 0.18 | Unknown             | -                        | -           |
| M_OA_114 | 6:137875997 | frameshift insertion   | TNFAIP3 | exon5  | NM_006290    | NP_006281    | c.637insA        | p.D212fs          | 0.15 | Unknown             | -                        | -           |
| M_GA_034 | 6:137877094 | frameshift deletion    | TNFAIP3 | exon6  | NM_006290    | NP_006281    | c.824delT        | p.L275fs          | 0.16 | Previously reported | -                        | -           |
| M_OA_105 | 6:137877127 | frameshift insertion   | TNFAIP3 | exon6  | NM_006290    | NP_006281    | c.858insA        | p.L286fs          | 0.23 | Unknown             | -                        | -           |
| M_OA_109 | 6:137877127 | frameshift insertion   | TNFAIP3 | exon6  | NM_006290    | NP_006281    | c.858insA        | p.L286fs          | 0.16 | Unknown             | -                        | -           |

|          |              |                        |           |        |           |           |                |              |      |                     |                          |             |
|----------|--------------|------------------------|-----------|--------|-----------|-----------|----------------|--------------|------|---------------------|--------------------------|-------------|
| M_GA_035 | 6:137878788  | stopgain               | TNFAIP3   | exon7  | NM_006290 | NP_006281 | c.1343G>A      | p.W448X      | 0.50 | Previously reported | -                        | COSM3734944 |
| M_GA_046 | 6:137880200  | nonsynonymous SNV      | TNFAIP3   | exon8  | NM_006290 | NP_006281 | c.2036T>C      | p.I679T      | 0.49 | Unknown             | 0.99 / probably damaging | -           |
| M_SA_051 | 6:137881243  | nonsynonymous SNV      | TNFAIP3   | exon9  | NM_006290 | NP_006281 | c.2297C>T      | p.A766V      | 0.24 | Unknown             | 0.99 / probably damaging | -           |
| M_OA_106 | 18:62354444  | nonsynonymous SNV      | TNFRSF11A | exon4  | NM_003839 | NP_003830 | c.337G>A       | p.A113T      | 0.12 | Unknown             | 0.86 / possibly damaging | -           |
| M_SA_051 | 18:62360004  | nonsynonymous SNV      | TNFRSF11A | exon6  | NM_003839 | NP_003830 | c.571G>A       | p.D191N      | 0.12 | Unknown             | 1 / probably damaging    | -           |
| M_SA_060 | 14:102871948 | nonsynonymous SNV      | TRAF3     | exon4  | NM_145725 | NP_663777 | c.277G>A       | p.E93K       | 0.27 | Unknown             | 0.55 / possibly damaging | -           |
| M_GA_040 | 14:102875678 | nonsynonymous SNV      | TRAF3     | exon5  | NM_145725 | NP_663777 | c.352C>T       | p.R118W      | 0.52 | Previously reported | 1 / probably damaging    | COSM144683  |
| M_SA_065 | 14:102886219 | nonsynonymous SNV      | TRAF3     | exon7  | NM_145725 | NP_663777 | c.601G>A       | p.V201M      | 0.16 | Unknown             | 0 / benign               | -           |
| M_SA_066 | 14:102903370 | frameshift deletion    | TRAF3     | exon11 | NM_145725 | NP_663777 | c.1076_1107del | p.N359fs     | 0.44 | Unknown             | -                        | -           |
| M_SA_052 | 14:102903403 | frameshift deletion    | TRAF3     | exon11 | NM_145725 | NP_663777 | c.1109_1110del | p.S370fs     | 0.35 | Unknown             | -                        | -           |
| M_SA_052 | 14:102903412 | nonframeshift deletion | TRAF3     | exon11 | NM_145725 | NP_663777 | c.1118_1135del | p.373_379del | 0.17 | Unknown             | -                        | -           |
| M_GA_001 | 14:102905590 | stopgain               | TRAF3     | exon12 | NM_145725 | NP_663777 | c.1513C>T      | p.R505X      | 0.20 | Previously reported | -                        | COSM4049221 |
| M_GA_038 | 14:102905674 | nonsynonymous SNV      | TRAF3     | exon12 | NM_145725 | NP_663777 | c.1597G>A      | p.G533S      | 0.29 | Unknown             | 1 / probably damaging    | -           |

**Supplementary Table S8:** Correlation between genetic changes and site involvement in ocular adnexal MALT lymphomas.

| Site                     | TNFAIP3 | TBL1XR1                      | MYD88                       | TNFRSF14                    | CREBBP | TP53 | IGHV3-23                     | IGHV4-34 |
|--------------------------|---------|------------------------------|-----------------------------|-----------------------------|--------|------|------------------------------|----------|
| Conjunctiva (n=19)       | 37%     | <b>26%</b><br><i>P=0.002</i> | 0%                          | 0%                          | 11%    | 0%   | <b>55%</b><br><i>P=0.002</i> | 18%      |
| Orbit (n=40)             | 43%     | 0%                           | 5%                          | <b>13%</b><br><i>P=0.04</i> | 0%     | 0%   | 4%                           | 22%      |
| Orbit+Conjunctiva (n=23) | 35%     | 9%                           | <b>17%</b><br><i>P=0.03</i> | 0%                          | 4%     | 9%   | 13%                          | 7%       |
| Lacrimal gland (n=16)    | 19%     | 0%                           | 0%                          | 6%                          | 0%     | 0%   | 15%                          | 15%      |

Significant findings are shown in bold
