# Supplementary material for: Novel GPR34 and CCR6 mutation and distinct genetic profiles in MALT lymphomas of different sites
Source: PubMed Central journal article supplement — Haematologica. 2018 Apr 19;103(8):1329–36. doi: 10.3324/haematol.2018.191601 (PMC6068028; doi:10.3324/haematol.2018.191601), 2018-08
Supplement: 2018_191601-Disclosures_and_Contributions.pdf [file 2018_191601-Disclosures_and_Contributions.pdf]

Haematologica  
HAEMATOL/2018/191601  
Version 3

Novel GPR34 and CCR6 mutation and distinct genetic profiles in MALT  
lymphomas of different sites

Sarah Moody, Joe Sneath Thompson, Shih-Sung Chuang, Hongxiang  
Liu, Markus Raderer, George Vassiliou, Iwona Wlodarska, Fangtian  
Wu, Sergio Cogliatti, Alistair Robson, Margaret Ashton-Key, Yingwen  
Bi, John Goodlad, and Ming-Qing Du

Disclosures: The research was supported by grants from Bloodwise (13006, 15002, 15019) UK, and Kay Kendal Leukaemia Fund (KKL582), UK. SM was initially supported by a PhD studentship from Medical Research Council, Department of Pathology, University of Cambridge and Addenbrooke's Charitable Trust. The authors declare no conflict of interest.

Contributions: Experimental design, data collection and analysis: SM, HL, FW; Illumina sequencing analysis and variant calling: JST, GV; Case contribution: SSC, MR, IW, SC, AR, MAK, YB, JG; Manuscript writing and preparation: MQD, SM; Research funding, study design and coordination: MQD.
